# Supplementary material for: Design, crystal structure and atomic force microscopy study of thioether ligatedd,l-cyclic antimicrobial peptides against multidrug resistant Pseudomonas aeruginosa
Source: Royal Society of Chemistry journal article supplement (doi:10.1039/c7sc01599b), 2017-01-01

## Supporting Information

### Discovery, crystal structure and atomic force microscopy study of thioether ligated D,L-cyclic antimicrobial peptides against multidrug resistant

#### *Pseudomonas aeruginosa*

Runze He,<sup>a†</sup> Ivan Di Bonaventura,<sup>a†</sup> Ricardo Visini,<sup>a</sup> Bee-Ha Gan,<sup>a</sup> Yongchun Fu,<sup>a</sup> Daniel Probst,<sup>a</sup> Alexandre Lüscher,<sup>b</sup>  
Thilo Köhler,<sup>b</sup> Christian van Delden,<sup>b</sup> Achim Stocker,<sup>a</sup> Wenjing Hong,<sup>a,c</sup> Tamis Darbre<sup>a</sup> and Jean-Louis Reymond<sup>a\*</sup>

<sup>a</sup> Department of Chemistry and Biochemistry, University of Bern, Freiestrasse 3, 3012 Bern, Switzerland, e-mail: jean-louis.reymond@dcb.unibe.ch

<sup>b</sup> Department of Microbiology and Molecular Medicine, University of Geneva, and Service of Infectious Diseases, University Hospital of Geneva, Geneva, Switzerland

<sup>c</sup> State Key Laboratory of Physical Chemistry of Solid Surfaces, College of Chemistry and Chemical Engineering, Xiamen University, Xiamen 361005, China

† The authors contributed equally to the work.

## Contents

|                                             |    |
|---------------------------------------------|----|
| Table S1:.....                              | 2  |
| Membrane interaction experiment .....       | 3  |
| Transmission Electron Microscopy (TEM)..... | 4  |
| Dynamic Light Scattering .....              | 5  |
| Atomic Force Microscopy (AFM).....          | 6  |
| Crystallography.....                        | 7  |
| Cheminformatics.....                        | 9  |
| Compound characterization.....              | 10 |

**Table S1:** Resistance profile of *P. aeruginosa* clinical isolates: R = resistant, I = intermediate, S = susceptible (classification according to CLSI guidelines), diam. = zone diameter in mm of a disk diffusion assay. Susceptibility testing was performed by the Clinical Bacteriology Laboratory of the Geneva University Hospitals.

|                           | PEJ-2.6<br>S/R | diam. | PEJ-9.1<br>S/R | diam. |
|---------------------------|----------------|-------|----------------|-------|
| Piperacillin              | R              | 13    | I              | 16    |
| Piperacillin/Tazobactam   | R              | 14    | S              | 22    |
| Ceftazidime               | S              | 18    | S              | 22    |
| Cefepime                  | S              | 22    | S              | 22    |
| Imipenem                  | R              | 10    | R              | 8     |
| Meropenem                 | R              | 15    | R              | 13    |
| Aztreonam                 | S              | 24    | S              | 29    |
| Amikacin                  | S              | 18    | S              | 18    |
| Gentamicin                | R              | 11    | R              | 12    |
| Tobramycin                | S              | 20    | S              | 21    |
| Norfloxacin               | S              | 18    | R              | 8     |
| Ciprofloxacin             | S              | 22    | R              | 8     |
| Trimethoprim + Sulfamides | R              | 10    | R              | 11    |
| Polymyxin B               | S              | 20    | S              | 20    |

|                           | ZEM-1A<br>S/R | diam. | ZEM-9A<br>S/R | diam. |
|---------------------------|---------------|-------|---------------|-------|
| Piperacillin              | R             | 12    | I             | 16    |
| Piperacillin/Tazobactam   | R             | 13    | I             | 18    |
| Ceftazidime               | R             | 6     | S             | 20    |
| Cefepime                  | R             | 6     | R             | 14    |
| Imipenem                  | R             | 10    | R             | 6     |
| Meropenem                 | R             | 8     | R             | 6     |
| Aztreonam                 | R             | 6     | R             | 9     |
| Amikacin                  | S             | 18    | R             | 6     |
| Gentamicin                | S             | 17    | R             | 7     |
| Tobramycin                | S             | 22    | S             | 17    |
| Norfloxacin               | R             | 10    | R             | 6     |
| Ciprofloxacin             | R             | 13    | R             | 10    |
| Trimethoprim + Sulfamides | R             | 6     | R             | 6     |
| Polymyxin B               | S             | 21    | S             | 15    |

## Membrane interaction experiment

Preparation: a thin lipid film was prepared by evaporating a solution of 25 mg Egg PG in 1 mL MeOH/CHCl<sub>3</sub> 1/1 on a rotary evaporator at room temperature and then in vacuo overnight. The resulting film was hydrated with 1 mL buffer (50 mM CF, 10 mM TIRS, 10 mM NaCl, pH 7.4) for 30 min, subjected to freeze-thaw cycles (7x) and extrusion (15x) through a polycarbonate membrane (pore size 100 nm). Extravesicular components were removed by gel filtration (Sephadex G-50) with 10 mM TRIS, 107 mM NaCl, pH 7.4. Final conditions: ~ 2.5 mM Egg PG; inside: 50 mM CF, 10 mM TIRS, 10 mM NaCl, pH 7.4; outside: 10 mM TRIS, 107 mM NaCl, pH 7.4.

Experiment: Egg PC or Egg PG stock solutions (37.5  $\mu$ L) were diluted with a buffer (10mM TRIS buffer, 107 mM NaCl, pH 7.4) and placed in a thermostated fluorescence cuvette and gently stirred (total volume in the cuvette ~3000  $\mu$ L; final lipid concentration ~31  $\mu$ M). CF efflux was monitored at  $\lambda_{em}$  517nm as a function of time after addition of 20 $\mu$ L of peptide in buffer with final concentrations of 1, 5, 7.5, 10, 15, 20  $\mu$ g/mL at time= 50 seconds and 1.2% Triton X-100 (30  $\mu$ L, 0.012% final concentration) at time= 300 seconds.

Fluorescence intensities were normalized to fractional emission intensity  $I(t)$  using  $I(t) = (I_t - I_0) / (I_\infty - I_0)$  where  $I_0$  is at peptide dendrimer addition,  $I_\infty = I_t$  at saturation of lysis.

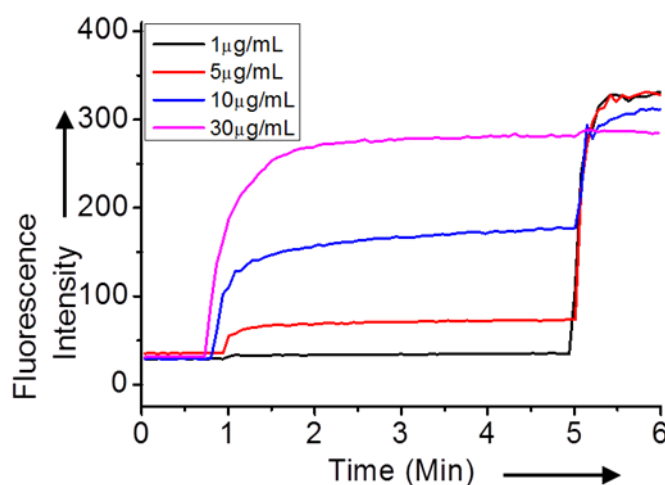

**Figure S1.** 5(6)-Carboxyfluorescein leakage from phosphatidylglycerol lipid vesicles. Addition of **RH11** to a lipid vesicle solution in buffer (10 mM TRIS, 107 mM NaCl, pH 7.4) at 50 s and addition of 1.2% Triton X-100 at 300 s.

## Transmission Electron Microscopy (TEM)

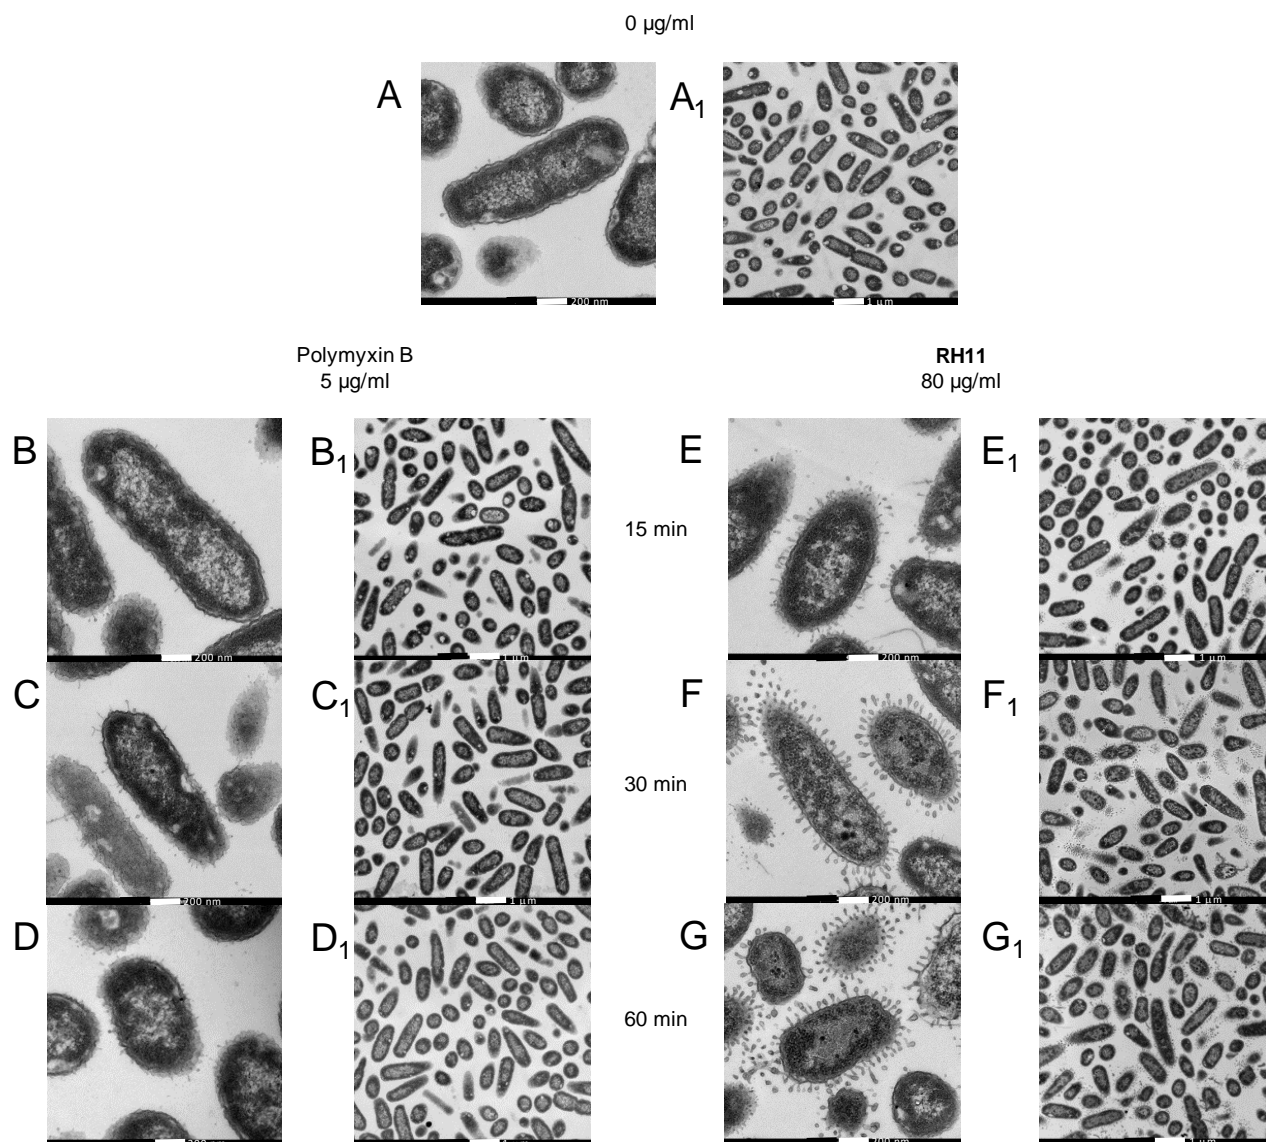

**Figure S2.** RH11 as membrane disruptive compound similarly to Polymyxin B. TEM pictures of untreated and treated *Pseudomonas aeruginosa*. Perturbations were observed on bacterial surfaces. **A and A<sub>1</sub>.** Untreated PAO1. **B and B<sub>1</sub>.** Polymyxin B treatment for 15 min. **C and C<sub>1</sub>.** Polymyxin B treatment for 30 min. **D and D<sub>1</sub>.** Polymyxin B treatment for 60 min. **E and E<sub>1</sub>.** RH11 treatment for 15 min. **F and F<sub>1</sub>.** RH11 treatment for 30 min. **G and G<sub>1</sub>.** RH11 treatment for 60 min.

## Dynamic Light Scattering

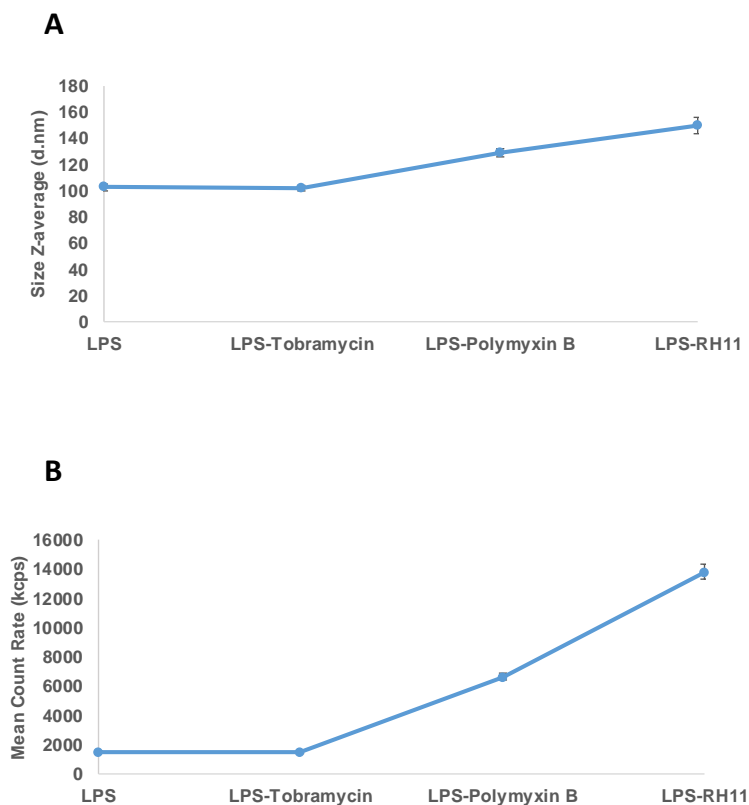

**Figure S3.** Changes of the hydrodynamic diameter of LPS aggregates in the presence of the compound of interest by using dynamic light scattering. LPS and the compounds were measured at 100  $\mu\text{g/mL}$ . Each sample was measured three times and the experiments were repeated three times. **A.** Size Z-average. **B.** Intensity Polydisperse Index (PDI). **C.** Mean Count Rate.

## Atomic Force Microscopy (AFM)

AFM imaging was performed under ambient conditions in air with a Nanosurf easyscan 2 (Nanosurf AG, Switzerland). All measurements were carried out in tapping mode employing PPP-NCHR-W cantilevers from Nanosensors (resonance frequency  $\sim 280$  kHz, tip radius  $\sim 10$  nm). The mica substrates ( $20 \times 20$  mm<sup>2</sup>) were attached to a steel baseplate with Scotch tape and freshly cleaved prior to each new experiment. Peptides (at concentration of  $4 \times \text{MIC}$ ) were incubated with bacterial cell (*B. subtilis* OD<sub>600</sub> = 0.1) in NaCl 0.9% for 10 min. The mixed solution was deposited onto a freshly cleaved mica surface. The solution was removed by gentle rinsing with Milli-Q water after 5 min of incubation time. After dried with Argon gas, the substrate was analyzed with atom force microscopy. Peptide without bacterial treatment and bacterial without peptides were also analyzed by AFM as control.

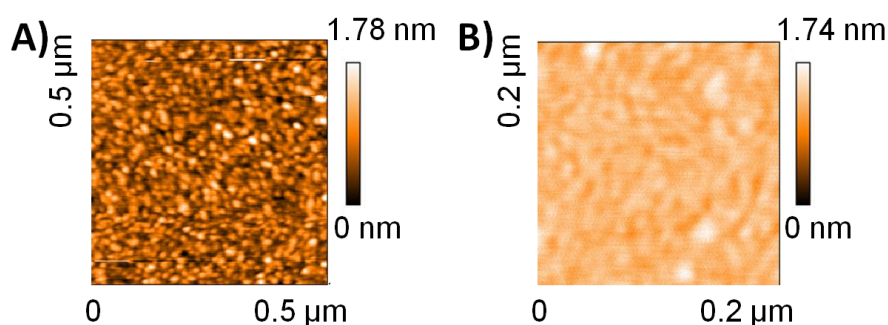

**Figure S4.** A) and B) are two examples of AFM image of **RH11** alone. Independent AFM of **RH11** analyses were measured more than 200 times, while no aggregated structure was observed.

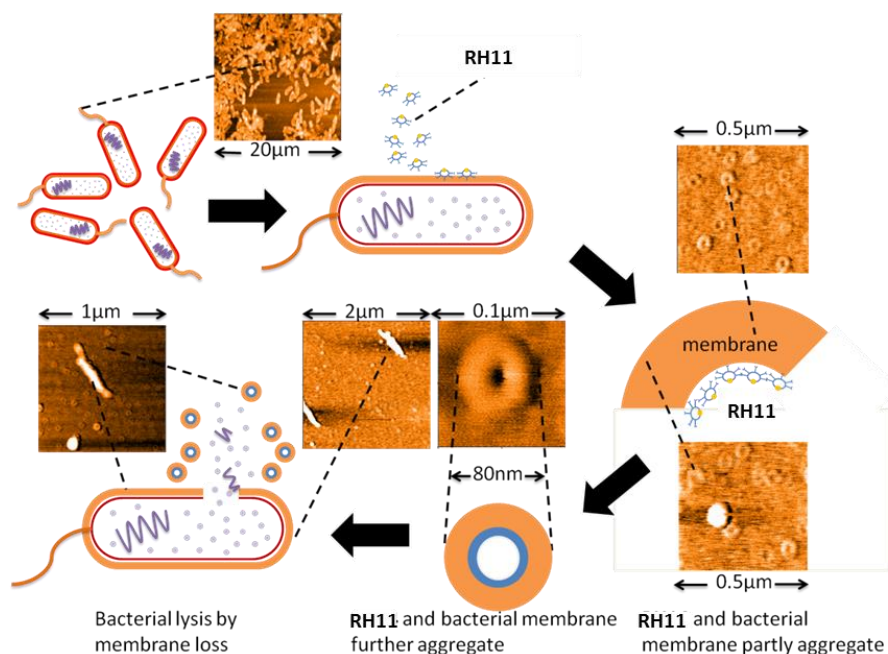

**Figure S5.** Proposed model of structures formed by aggregation of the peptide at the bacterial membrane followed by detachment when a critical size has been reached, leading to membrane lysis and cell death in the case of bacteria.

## Crystallography

**Table S2.** Crystallographic data.

| Structural data                   | FdRH11o-LecB                        | FRH11o-LecB                             | FdRH11m-LecB                                |
|-----------------------------------|-------------------------------------|-----------------------------------------|---------------------------------------------|
| Beam line                         | PXIII                               | PXIII                                   | PXIII                                       |
| Wavelength(Å)                     | 1.000030                            | 1.000030                                | 1.036790                                    |
| Resolution(Å)                     | 47.03 - 1.27                        | 47.43 - 1.55                            | 47.75 - 1.60                                |
| <b>Cell dimension</b>             |                                     |                                         |                                             |
| Space group                       | P 21 21 21 (No. 19)                 | C 1 2 1 (No. 5)                         | P 1 (No. 1)                                 |
| Unit cell(Å)                      | 45.28, 99.97, 106.61,<br>90, 90, 90 | 94.93, 45.75, 103.85,<br>90, 114.99, 90 | 45.18, 48.50, 52.54,<br>84.92, 79.97, 80.58 |
| Measured reflection/unique        | 399675/120478                       | 121544/53265                            | 91692/51266                                 |
| Average multiplicity              | 3.31                                | 2.23                                    | 1.78                                        |
| Completeness (%)                  | 94.1%                               | 86.9%                                   | 90.6%                                       |
| Average I/σ(I)                    | 13.95                               | 12.44                                   | 23.48                                       |
| Correlation CC (1/2) (%)          | 99.9                                | 99.8                                    | 99.9                                        |
| Wilson B-factor                   | 11.23                               | 14.70                                   | 8.58                                        |
| <b>Refinement</b>                 |                                     |                                         |                                             |
| Resolution range (Å)              | 47.03 - 1.27                        | 47.43 - 1.55                            | 47.75 - 1.60                                |
| $R_{\text{work}}$ (%)             | 0.1628                              | 0.1847                                  | 0.1425                                      |
| $R_{\text{free}}$ (%)             | 0.1845                              | 0.2173                                  | 0.1640                                      |
| Average Biso (Å <sup>2</sup> )    | 15.8                                | 18.4                                    | 11.0                                        |
| All atoms                         | 4296                                | 3828                                    | 4005                                        |
| Solvent atoms                     | 596                                 | 393                                     | 572                                         |
| RMSD from ideality angles (°)     | 1.260                               | 1.052                                   | 0.918                                       |
| Bonds (Å)                         | 0.011                               | 0.008                                   | 0.007                                       |
| Protein Data Bank deposition code | 5NF0                                | 5NEY                                    | 5NES                                        |

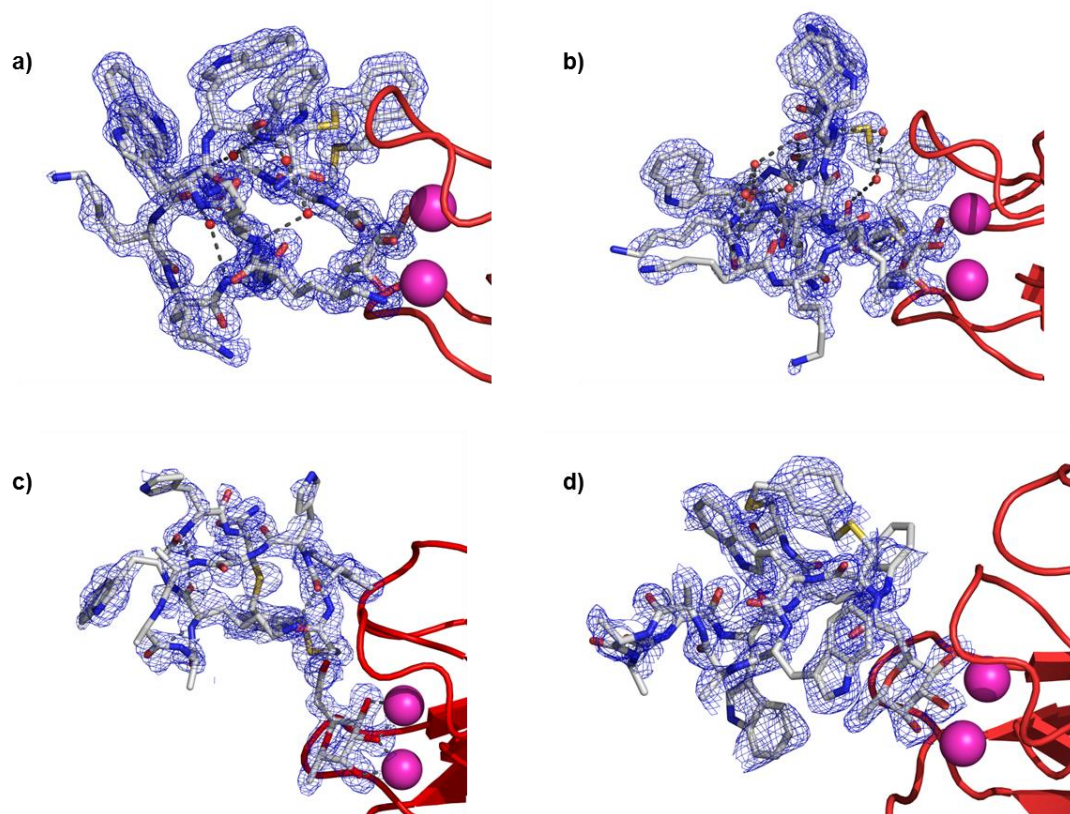

**Figure S6.** Structures of the different conformations of the monocyclic (in blue dash density). (a) FdRH11o (conformation 2), b) FdRH11o (conformation 3), c) FRH11o and d) FdRH11m.



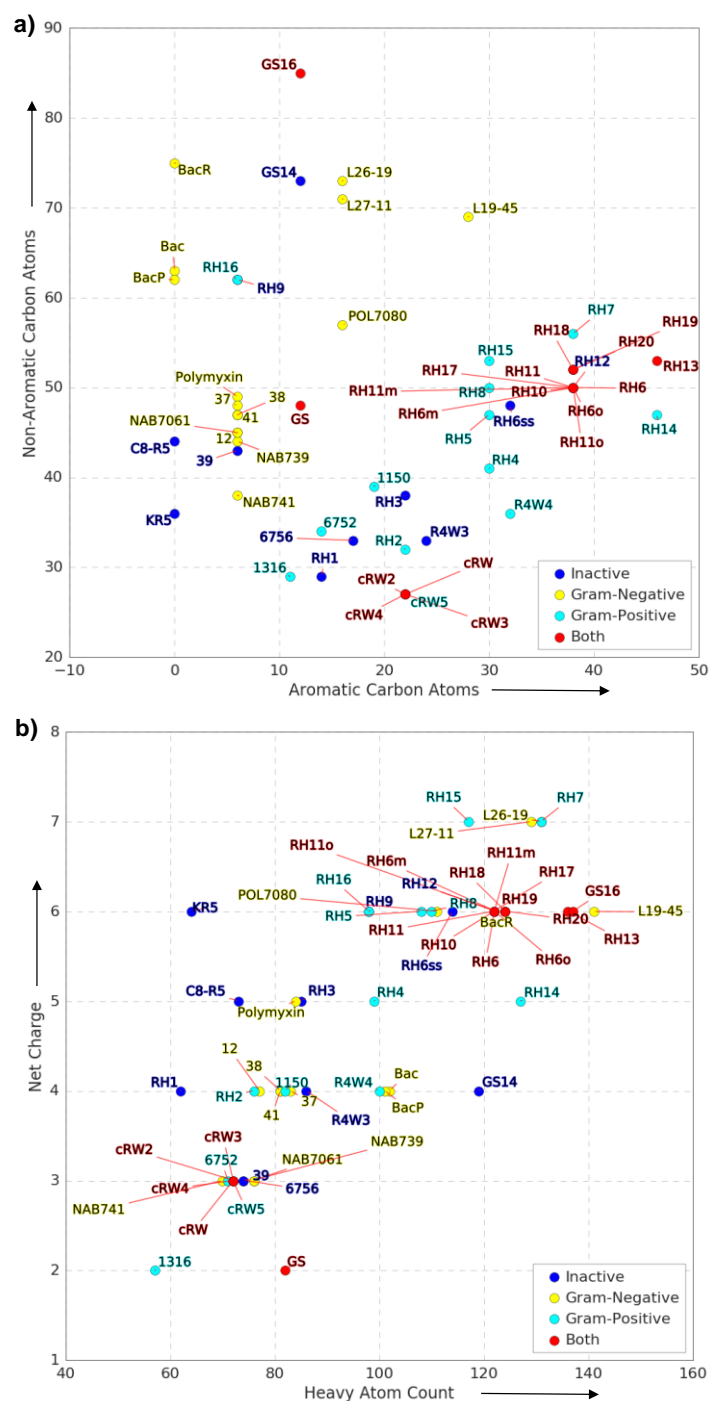

**Figure S7.** Molecular property analysis of CAMPs collected from the literature (see main text for refs.) and in this work. Compounds codes are given as in the original publications. Polymyxin analogs: 12, 41, 37, 38, 39, NAB7061, NAB739, NAB741; POL7080 analogs: L27-11, L26-19, L18-45; Gramicidin and analogs: GS, GS14, GS16; bactenecin and analogs: Bac, BacR, BacP; all other codes refer to either to antimicrobial cyclic hexa- to octa-peptides, or to CAMPs from this work. Activities are color-coded as inactive (blue) Gram-negative ( $\text{MIC} \leq 16 \mu\text{g/mL}$  on *P. aeruginosa* or *E. coli*, yellow), Gram-positive ( $\text{MIC} \leq 8 \mu\text{g/mL}$  on *S. aureus* or *B. subtilis*, cyan), or both Gram+ and Gram- (red). The list of cpds with SMILES and compound code is provided in the supporting information. **(a)** Scatter plots of the non-aromatic carbon count versus aromatic carbon count. **(b)** Scatter plot of positive charges versus molecular size (measured as heavy atom count: all non-hydrogen atoms).

## Compound characterization

**RH1**. Starting with 400 mg of Tenta Gel S RAM (0.25 mmol/g). Peptide **RH1** was obtained as white solid after preparative RP-HPLC purification (11.0 mg, 12.3 %). Prep. RP-HPLC (A/D = 100/0 to 0/100 in 60 min, 60 mL/min) Analytical RP-HPLC:  $t_R$  = 1.55 min (A/D = 100/0 to 0/100 in 5 min, 1.2 mL/min). MS (ESI<sup>+</sup>) calculated for C<sub>43</sub>H<sub>65</sub>N<sub>11</sub>O<sub>6</sub>S<sub>2</sub> [M+H]<sup>+</sup>: 896.46, found: 896.42, [M+Na]<sup>+</sup>: 918.45, found: 918.42.

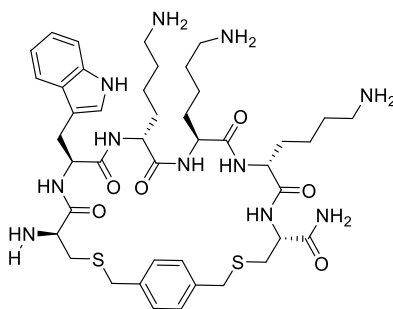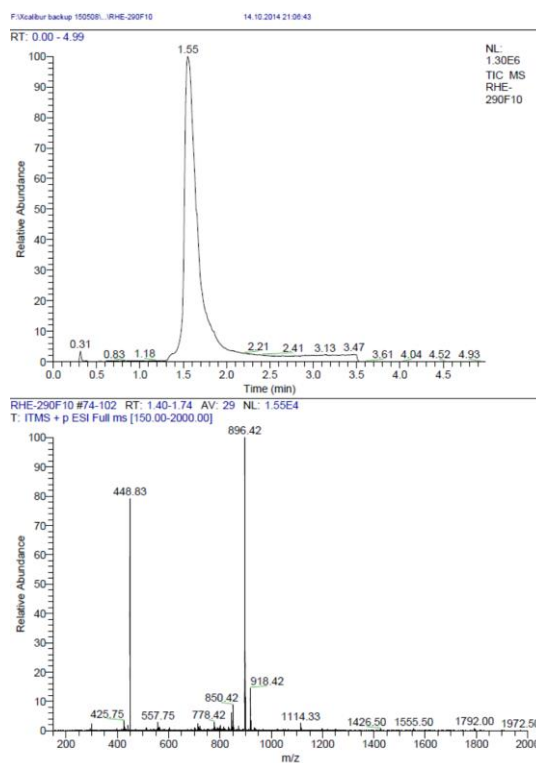

**RH2.** Starting with 400 mg of Tenta Gel S RAM (0.25 mmol/g). Peptide **RH2** was obtained as white solid after preparative RP-HPLC purification (2.2 mg, 2.0 %). Prep. RP-HPLC (A/D = 100/0 to 0/100 in 60 min, 60 mL/min). Analytical RP-HPLC:  $t_R = 1.72$  min (A/D = 100/0 to 0/100 in 5min, 1.2 mL/min). MS (ESI+) calculated for  $C_{54}H_{75}N_{13}O_7S_2$   $[M+H]^+$ : 1082.54, found: 1082.50.

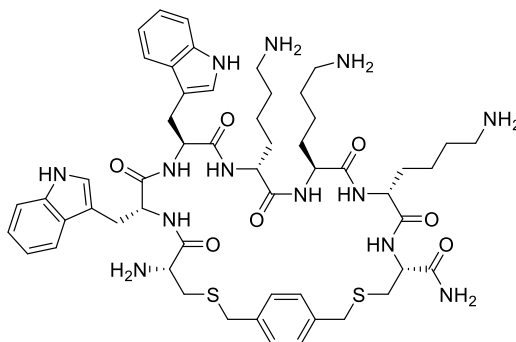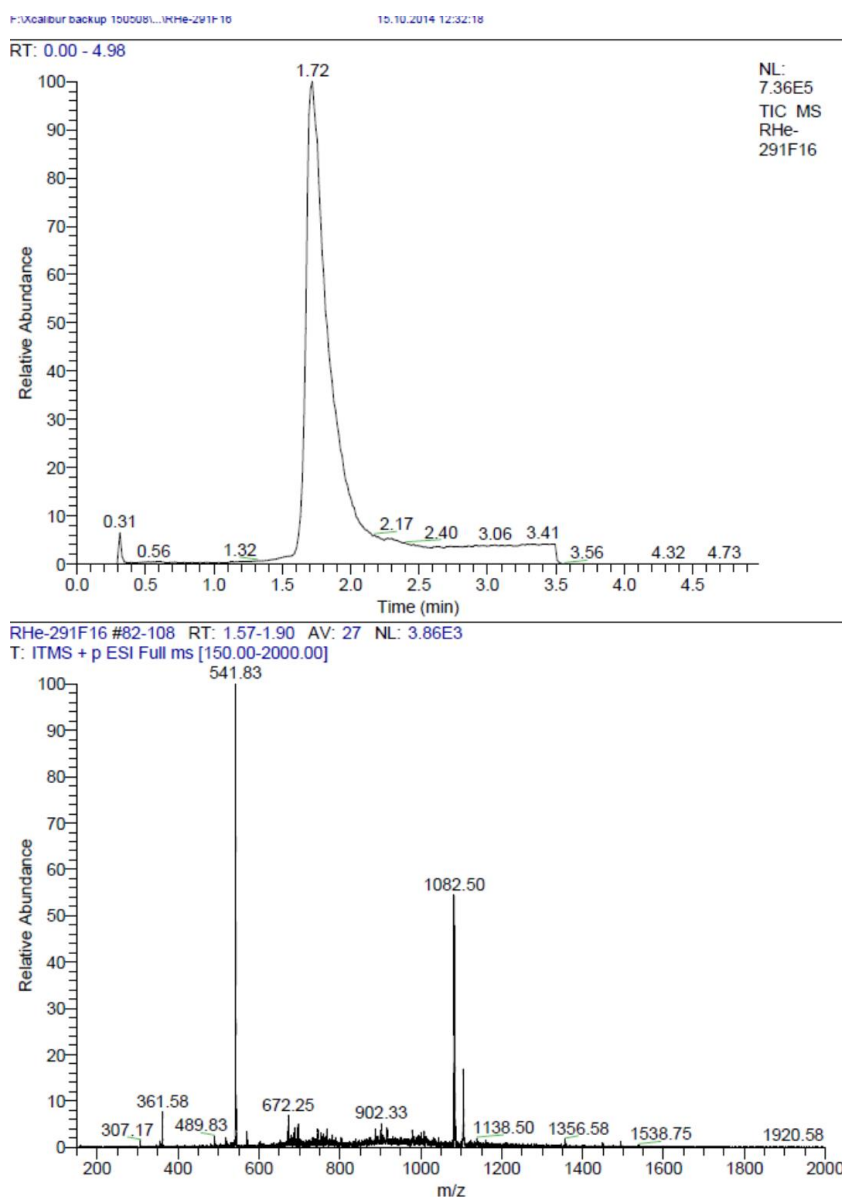

**RH3.** Starting with 400 mg of Tenta Gel S RAM (0.25 mmol/g). Peptide **RH3** was obtained as white solid after preparative RP-HPLC purification (1.8mg, 1.5 %). Prep. RP-HPLC (A/D = 100/0 to 0/100 in 60 min, 60 mL/min). Analytical RP-HPLC:  $t_R$  = 3.05 min (A/D = 100/0 to 0/100 in 10 min, 1.2 mL/min). MS (ESI+) calculated for  $C_{60}H_{87}N_{15}O_8S_2$   $[M+H]^+$ : 1210.63, found: 1210.6,  $[M+Na]^+$ : 1232.53, found: 1232.59.

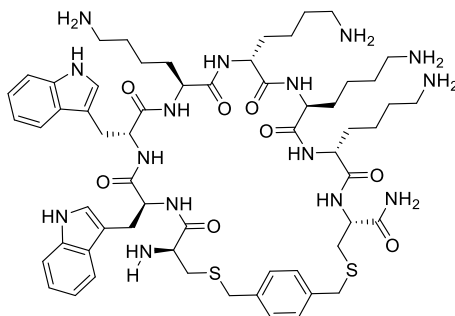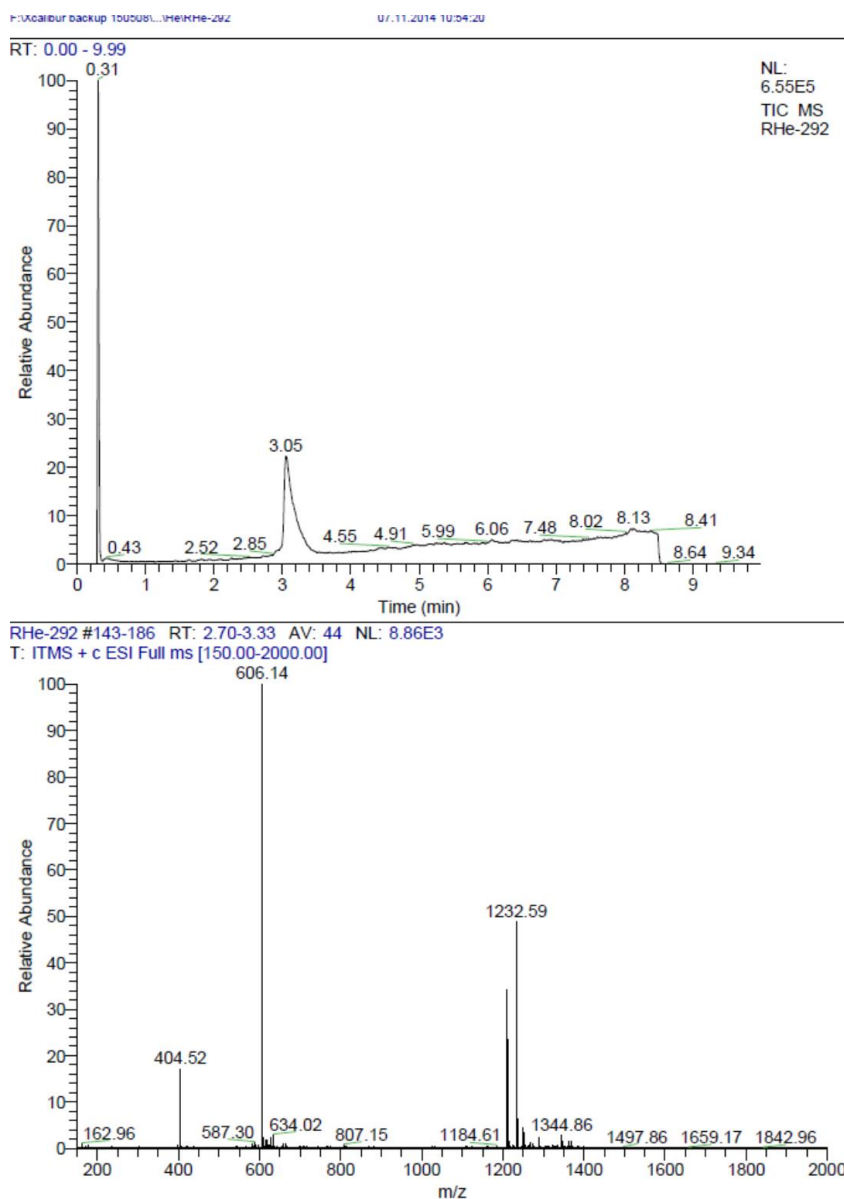

**RH4**. Starting with 400 mg of Tenta Gel S RAM (0.25 mmol/g). Peptide **RH4** was obtained as white solid after preparative RP-HPLC purification (17.1mg, 12.2 %). Prep. RP-HPLC (A/D = 100/0 to 0/100 in 60 min, 60 mL/min). Analytical RP-HPLC:  $t_R = 3.27$  min (A/D = 100/0 to 0/100 in 10 min, 1.2 mL/min). MS (ESI+) calculated for  $C_{71}H_{97}N_{75}O_9S_2$   $[M+H]^+$ : 1396.71, found: 1396.45.

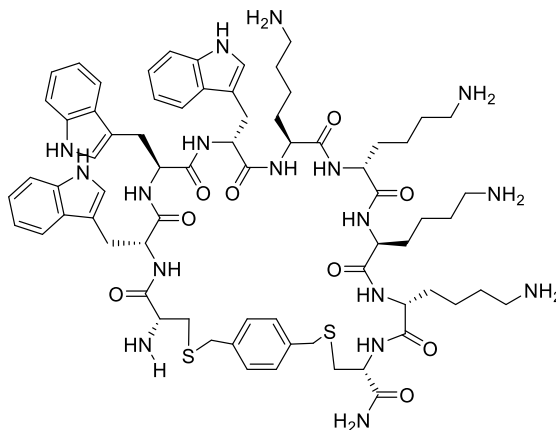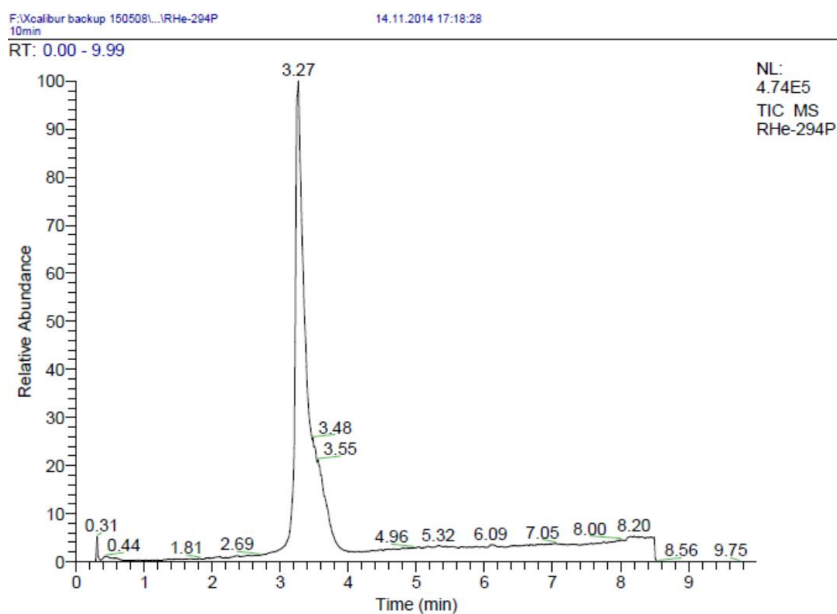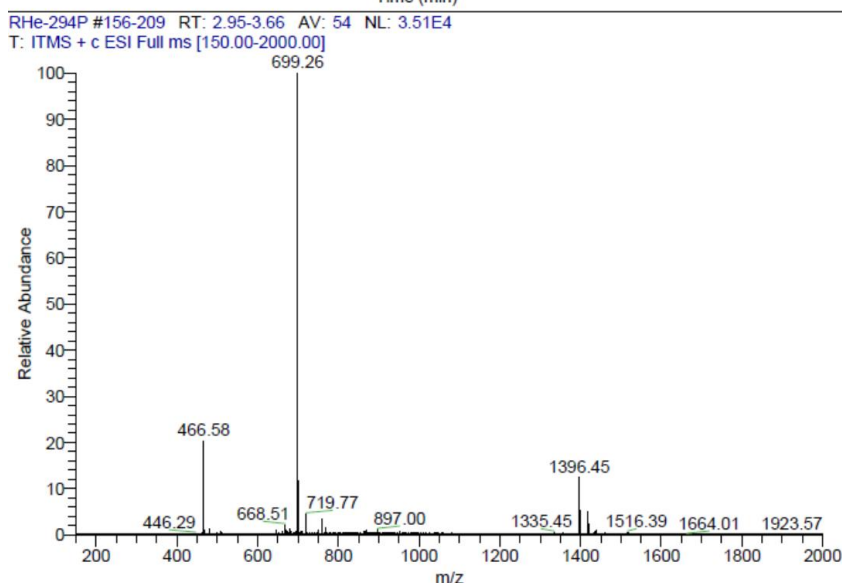

**RH5.** Starting with 400 mg of Tenta Gel S RAM (0.25 mmol/g). Peptide **RH5** was obtained as white solid after preparative RP-HPLC purification (8.7mg, 5.6 %). Prep. RP-HPLC (A/D = 100/0 to 0/100 in 60 min, 60 mL/min). Analytical RP-HPLC:  $t_R = 1.63$  min (A/D = 100/0 to 0/100 in 5 min, 1.2 mL/min). MS (ESI+) calculated for  $C_{77}H_{109}N_{19}O_{10}S_2$   $[M+H]^+$ : 1524.80, found: 1524.33.

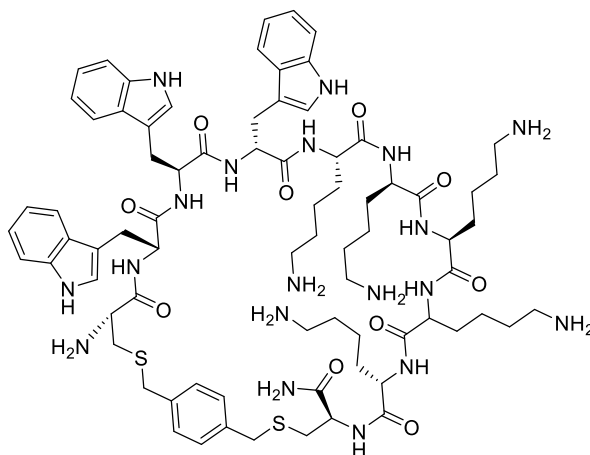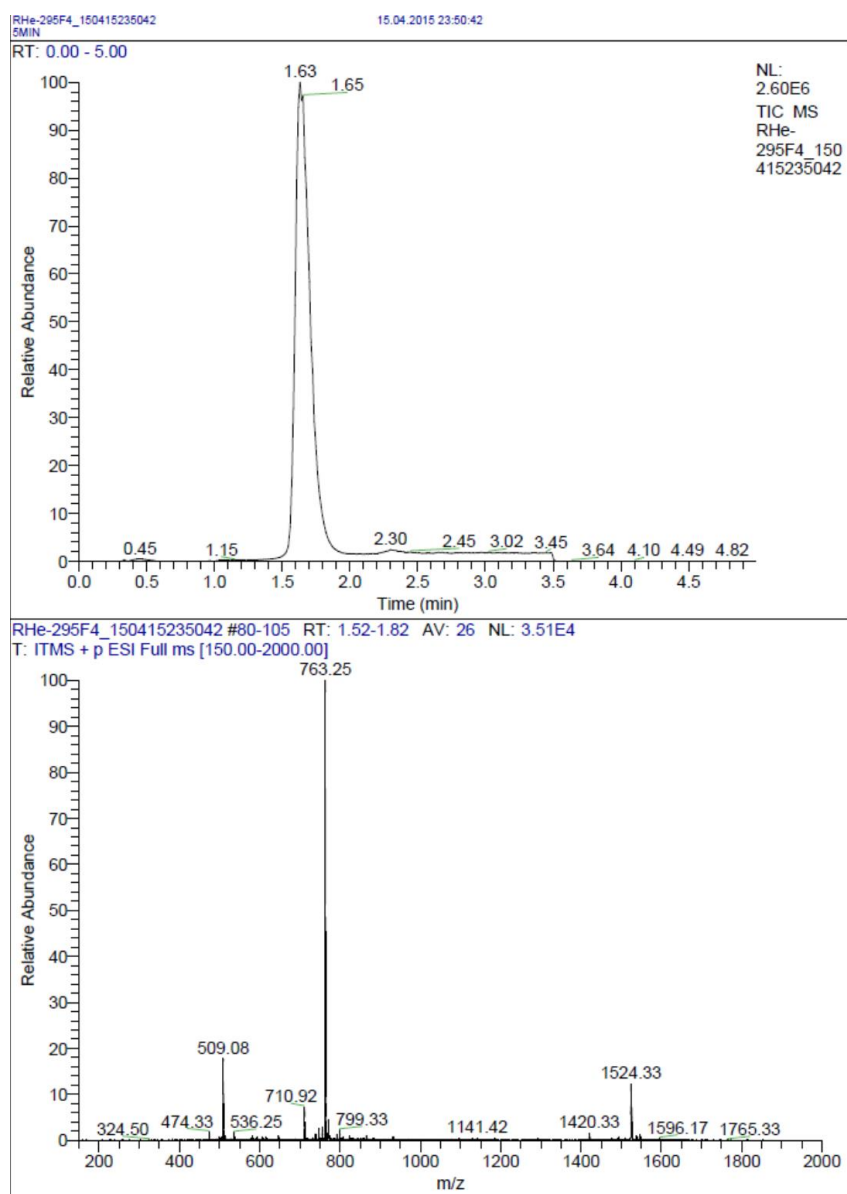

**RH6.** Starting with 400 mg of Tenta Gel S RAM (0.25 mmol/g). Peptide **RH6** was obtained as white solid after preparative RP-HPLC purification (11.4mg, 6.7 %). Prep. RP-HPLC (A/D = 100/0 to 0/100 in 60 min, 60 mL/min). Analytical RP-HPLC:  $t_R = 1.65$  min (A/D = 100/0 to 0/100 in 5 min, 1.2 mL/min). MS (ESI+) calculated for  $C_{88}H_{119}N_{21}O_{11}S_2$   $[M+H]^+$ : 1711.55, found: 1711.42.

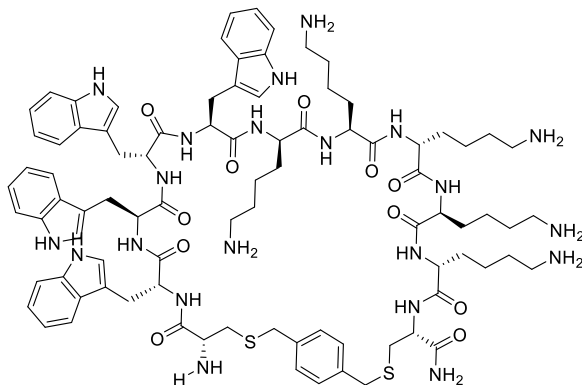

F:\Xcalibur backup 150508\...RHe-296F10

17.11.2014 20:47:44

RT: 0.00 - 4.99

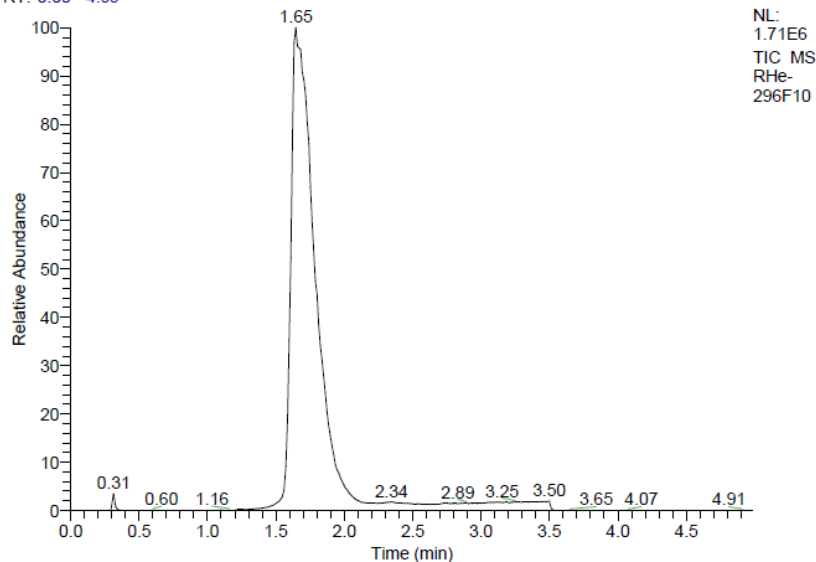

NL:  
1.71E6  
TIC MS  
RHe-  
296F10

RHe-296F10 #80-114 RT: 1.52-1.93 AV: 35 NL: 6.47E3  
T: ITMS + p ESI Full ms [150.00-2000.00]

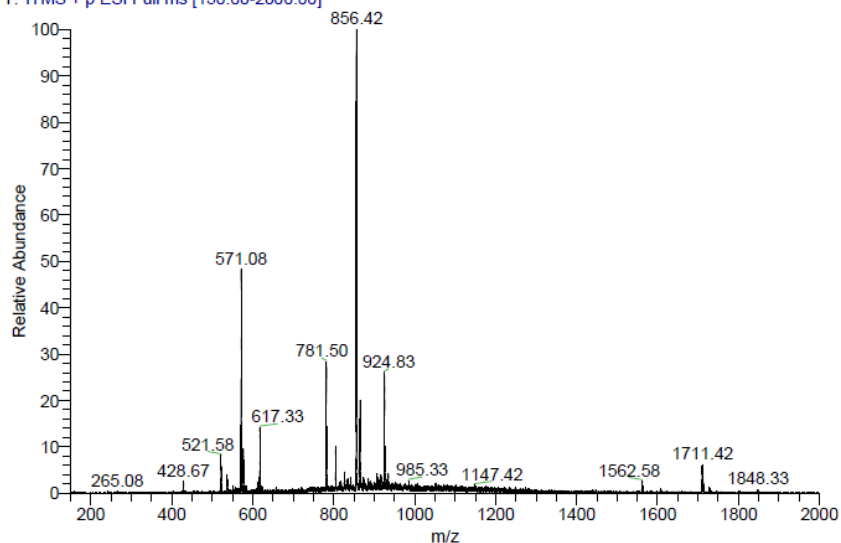

**RH7.** Starting with 400 mg of Tenta Gel S RAM (0.25 mmol/g). Peptide **RH7** was obtained as white solid after preparative RP-HPLC purification (17.5mg, 9.5%). Prep. RP-HPLC (A/D = 100/0 to 0/100 in 60 min, 60 mL/min). Analytical RP-HPLC:  $t_R = 1.62$  min (A/D = 100/0 to 0/100 in 5 min, 1.2 mL/min). MS (ESI+) calculated for  $C_{94}H_{131}N_{23}O_{12}S_2$   $[M+H]^+$ : 1838.98, found: 1838.58.

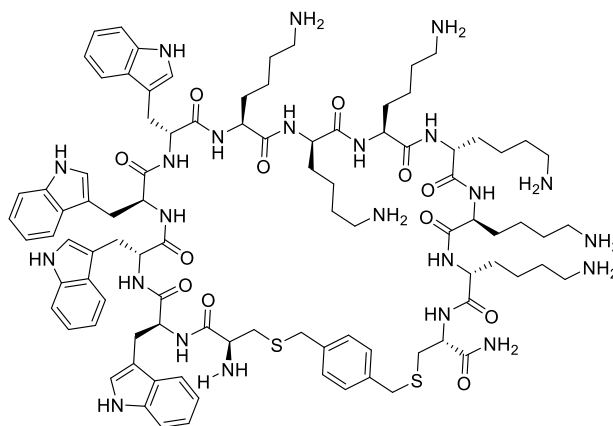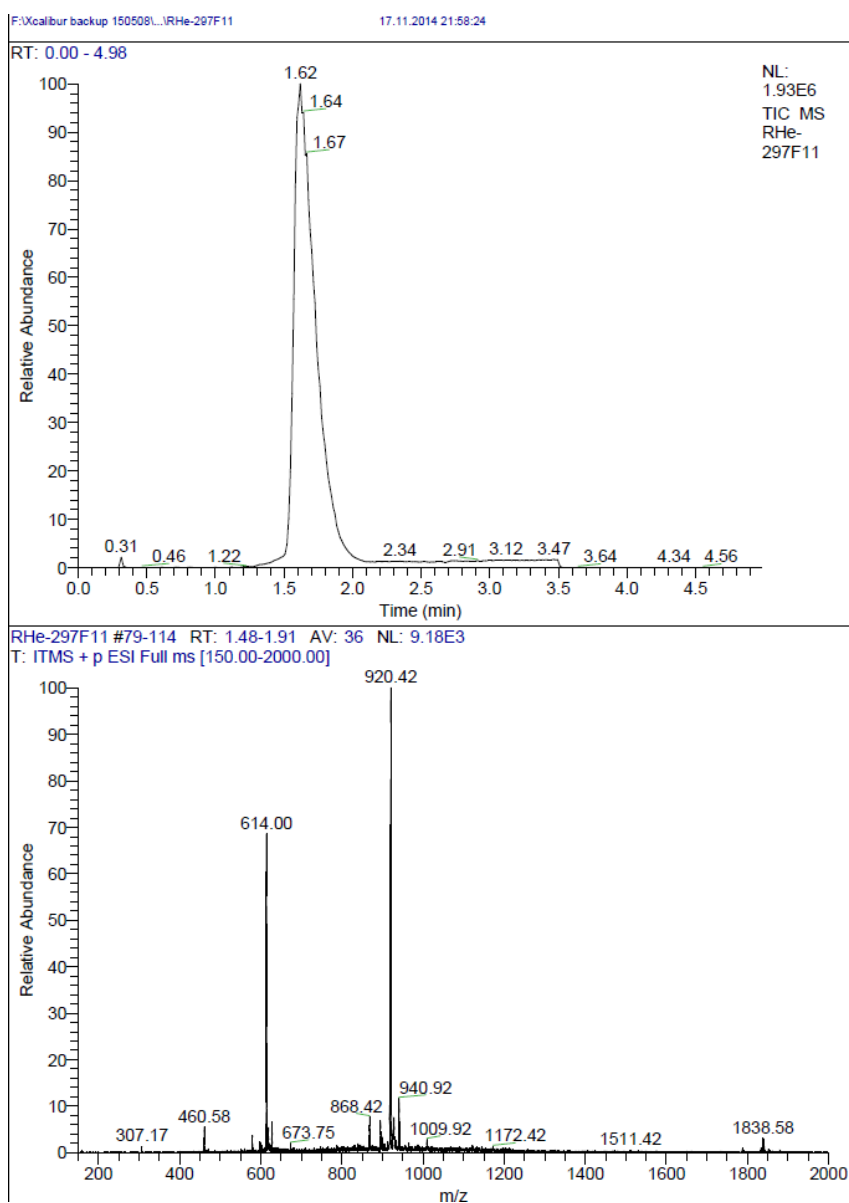



**RH6m.** Starting with 400 mg of Tenta Gel S RAM (0.25 mmol/g). Peptide **RH6m** was obtained as white solid after preparative RP-HPLC purification (8.7mg, 5.1%). Prep. RP-HPLC (A/D = 100/0 to 0/100 in 60 min, 60 mL/min). Analytical RP-HPLC:  $t_R$  = 1.70 min (A/D = 100/0 to 0/100 in 5 min, 1.2 mL/min). MS (ESI+) calculated for  $C_{88}H_{119}N_{21}O_{11}S_2$   $[M+H]^+$ : 1711.15, found: 1711.25.

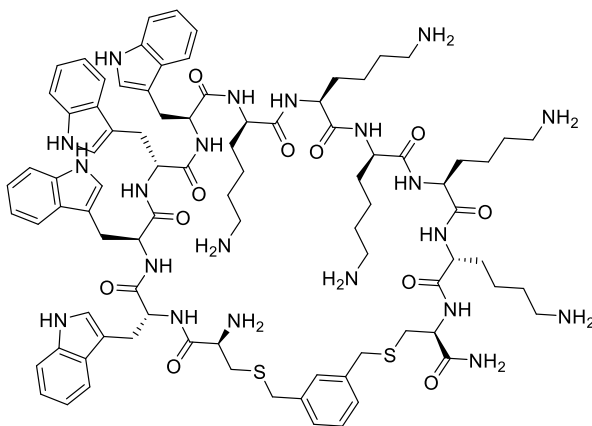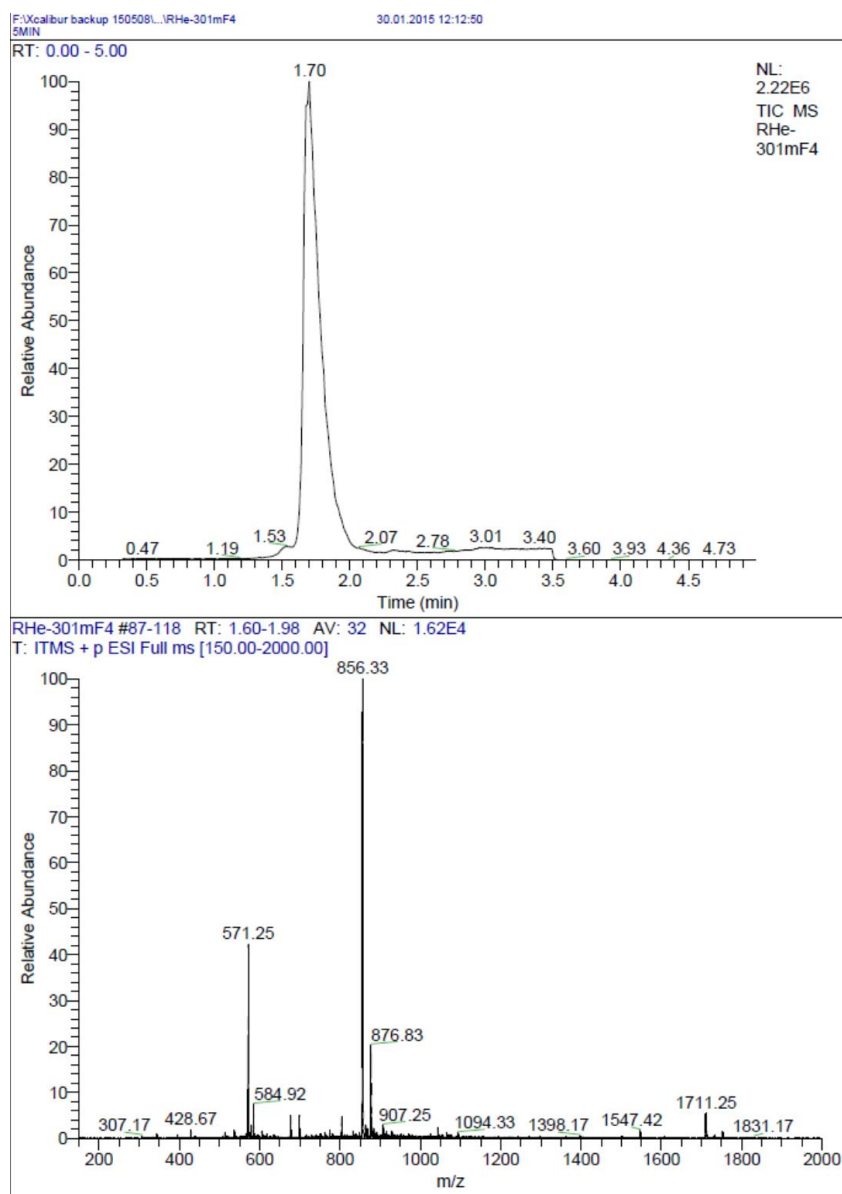

**RH60.** Starting with 400 mg of Tenta Gel S RAM (0.25 mmol/g). Peptide **RH60** was obtained as white solid after preparative RP-HPLC purification (9.6mg, 5.6%). Prep. RP-HPLC (A/D = 100/0 to 0/100 in 60 min, 60 mL/min). Analytical RP-HPLC:  $t_R$  = 1.57 min (A/D = 100/0 to 0/100 in 5 min, 1.2 mL/min). MS (ESI+) calculated for  $C_{88}H_{119}N_{21}O_{11}S_2$   $[M+H]^+$ : 1711.15, found: 1711.33.

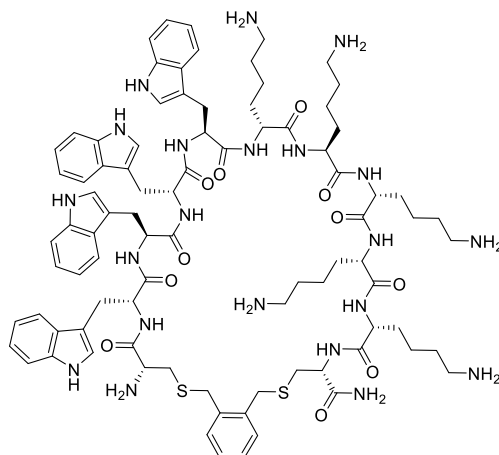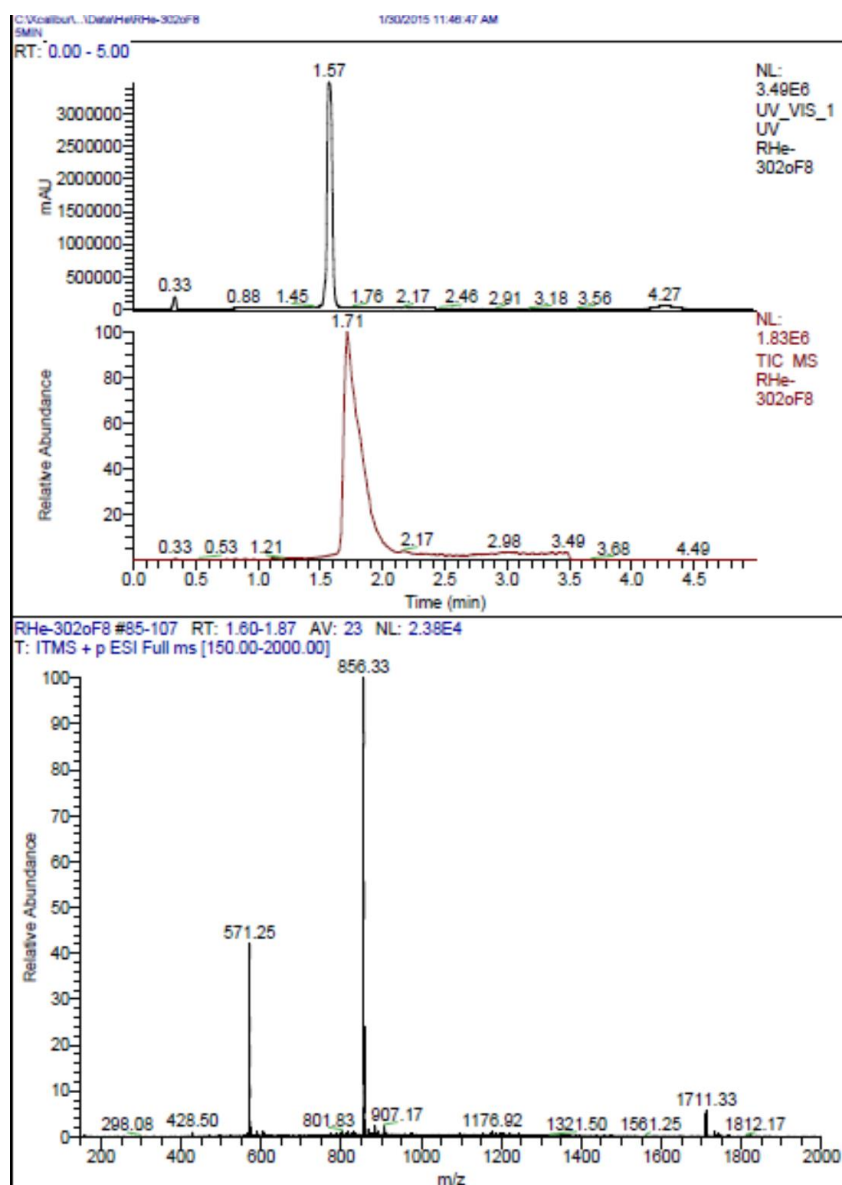

**RH6ss.** Starting with 400 mg of Tenta Gel S RAM (0.25 mmol/g). Peptide **RH6ss** was obtained as white solid after preparative RP-HPLC purification (17.5mg, 10.9%). Prep. RP-HPLC (A/D = 100/0 to 0/100 in 60 min, 60 mL/min). Analytical RP-HPLC:  $t_R = 1.75$  min (A/D = 100/0 to 0/100 in 5 min, 1.2 mL/min). MS (ESI+) calculated for  $C_{80}H_{111}N_{21}O_{11}S_2$   $[M+H]^+$ : 1607.01, found: 1607.58.

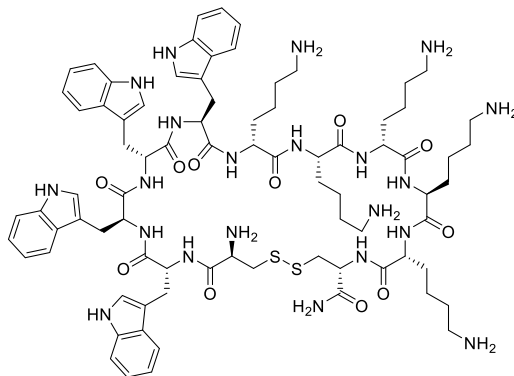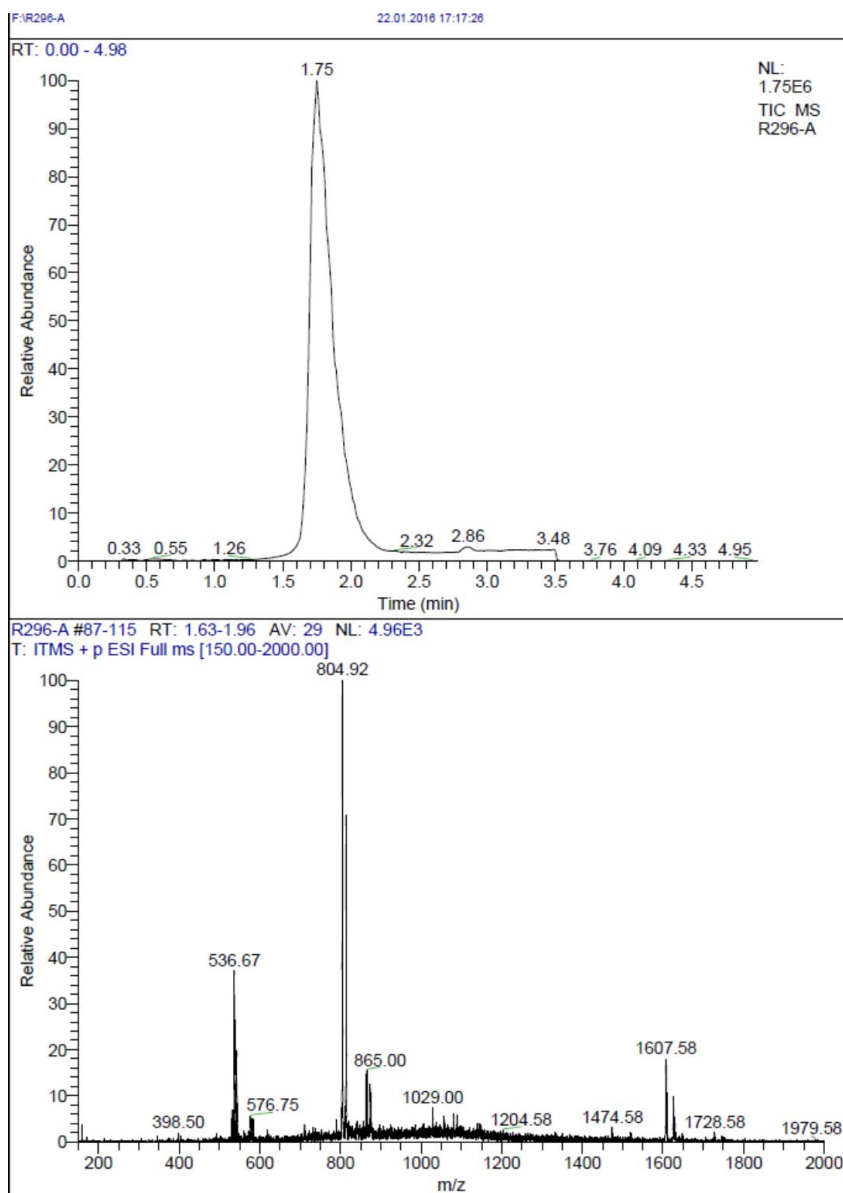

**RH8**. Starting with 400 mg of Tenta Gel S RAM (0.25 mmol/g). Peptide **RH8** was obtained as white solid after preparative RP-HPLC purification (7.7mg, 5.0%). Prep. RP-HPLC (A/D = 100/0 to 0/100 in 60 min, 60 mL/min). Analytical RP-HPLC:  $t_R = 3.35$  min (A/D = 100/0 to 0/100 in 10 min, 1.2 mL/min). MS (ESI+) calculated for  $C_{80}H_{115}N_{17}O_{11}S_2$   $[M+H]^+$ : 1554.84, found: 1554.27.

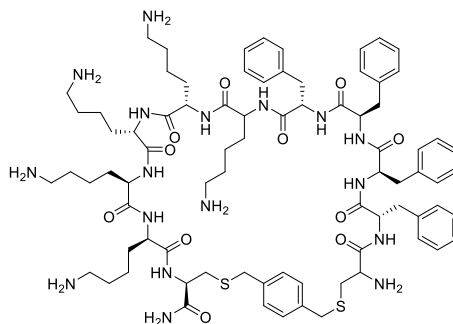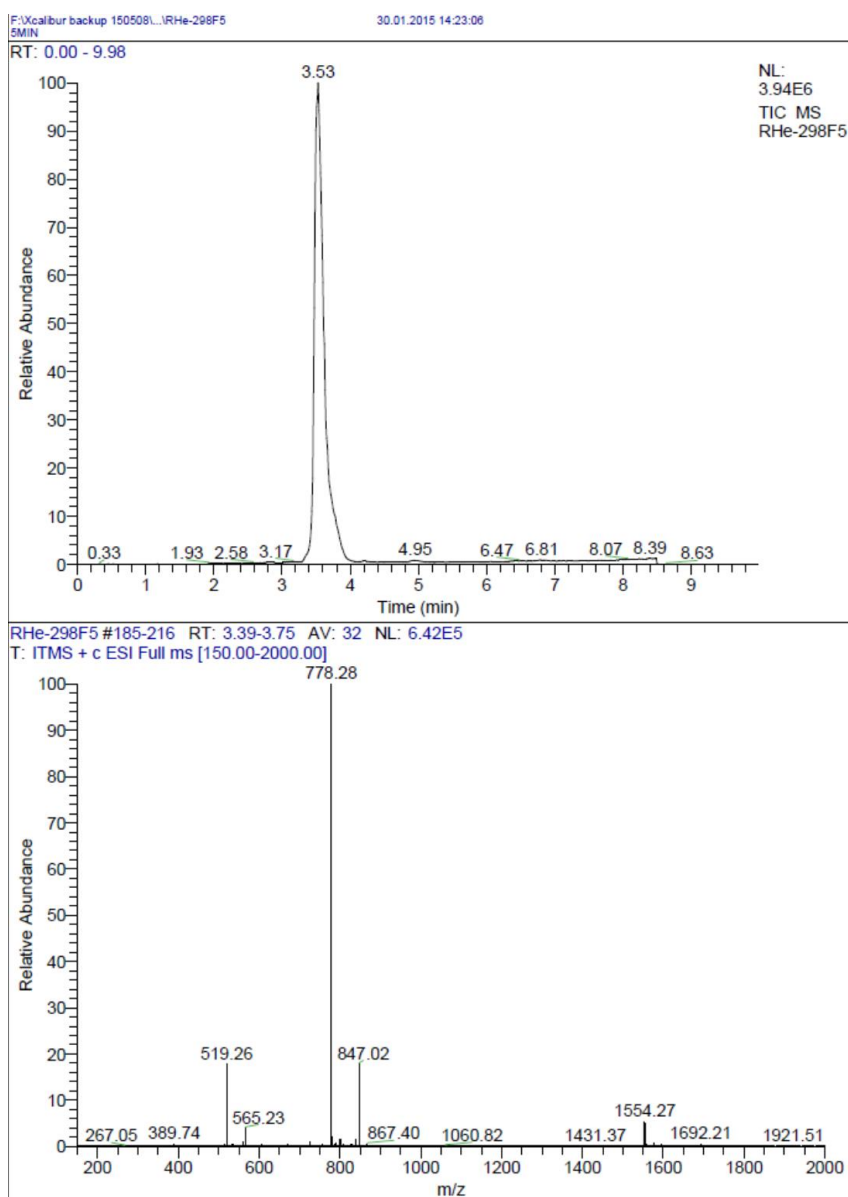

**RH9.** Starting with 400 mg of Tenta Gel S RAM (0.25 mmol/g). Peptide **RH9** was obtained as white solid after preparative RP-HPLC purification (28.8, 20.3%). Prep. RP-HPLC (A/D = 100/0 to 0/100 in 60 min, 60 mL/min). Analytical RP-HPLC:  $t_R = 1.65$  min (A/D = 100/0 to 0/100 in 5 min, 1.2 mL/min). MS (ESI+) calculated for  $C_{68}H_{123}N_{17}O_{11}S_2$   $[M+H]^+$ : 1418.90, found: 1418.42.

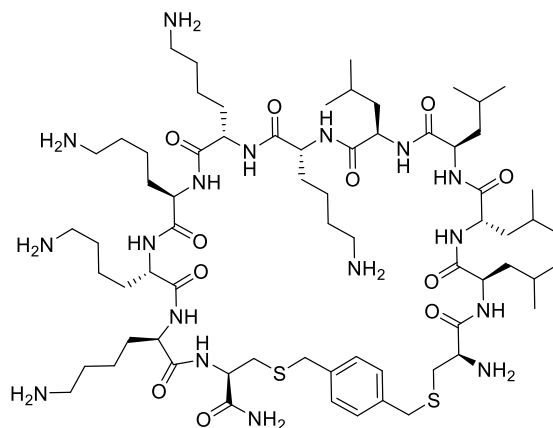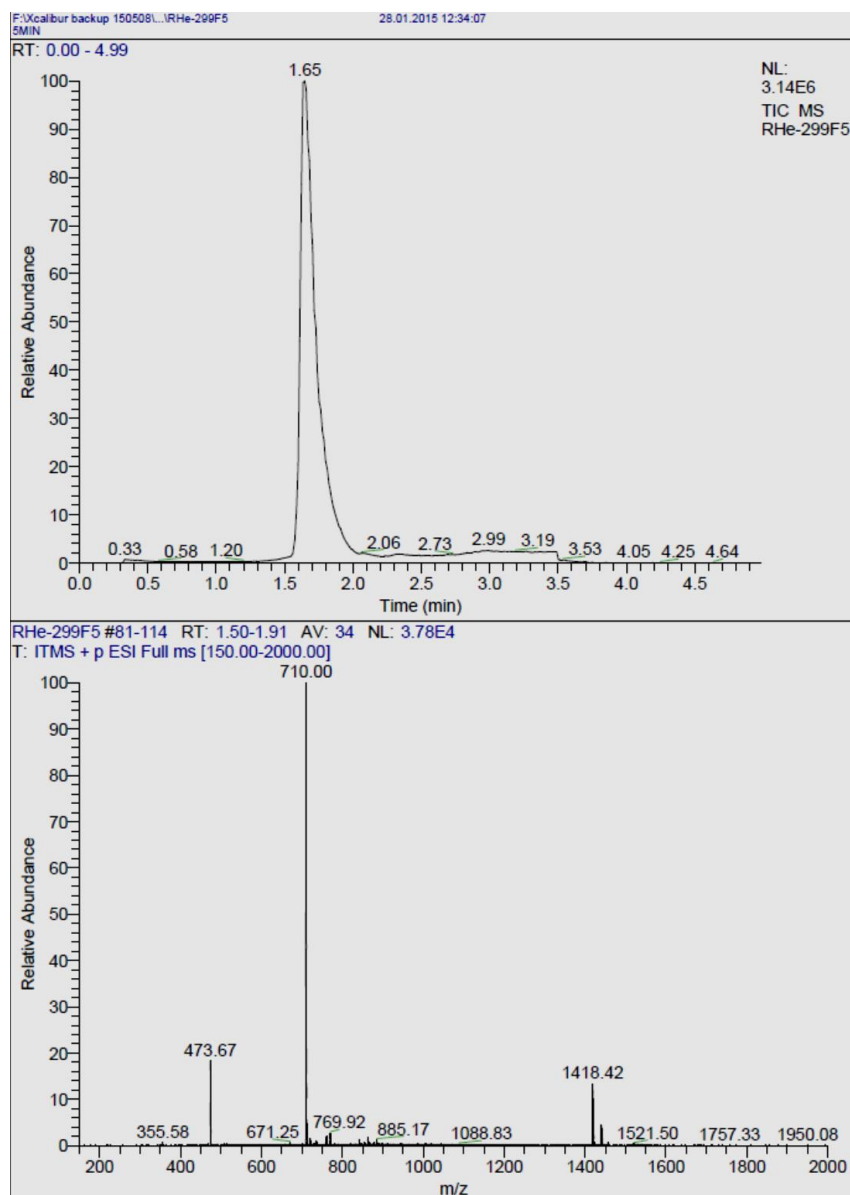

**RH10.** Starting with 400 mg of Tenta Gel S RAM (0.25 mmol/g). Peptide **RH10** was obtained as white solid after preparative RP-HPLC purification (13.7mg, 8.0%). Prep. RP-HPLC (A/D = 100/0 to 0/100 in 60 min, 60 mL/min). Analytical RP-HPLC:  $t_R = 1.47$  min (A/D = 100/0 to 0/100 in 5 min, 1.2 mL/min). MS (ESI+) calculated for  $C_{88}H_{119}N_{21}O_{11}S_2$   $[M+H]^+$ : 1711.15, found: 1711.25.

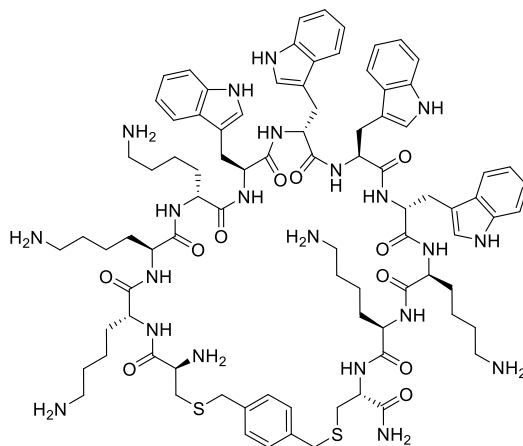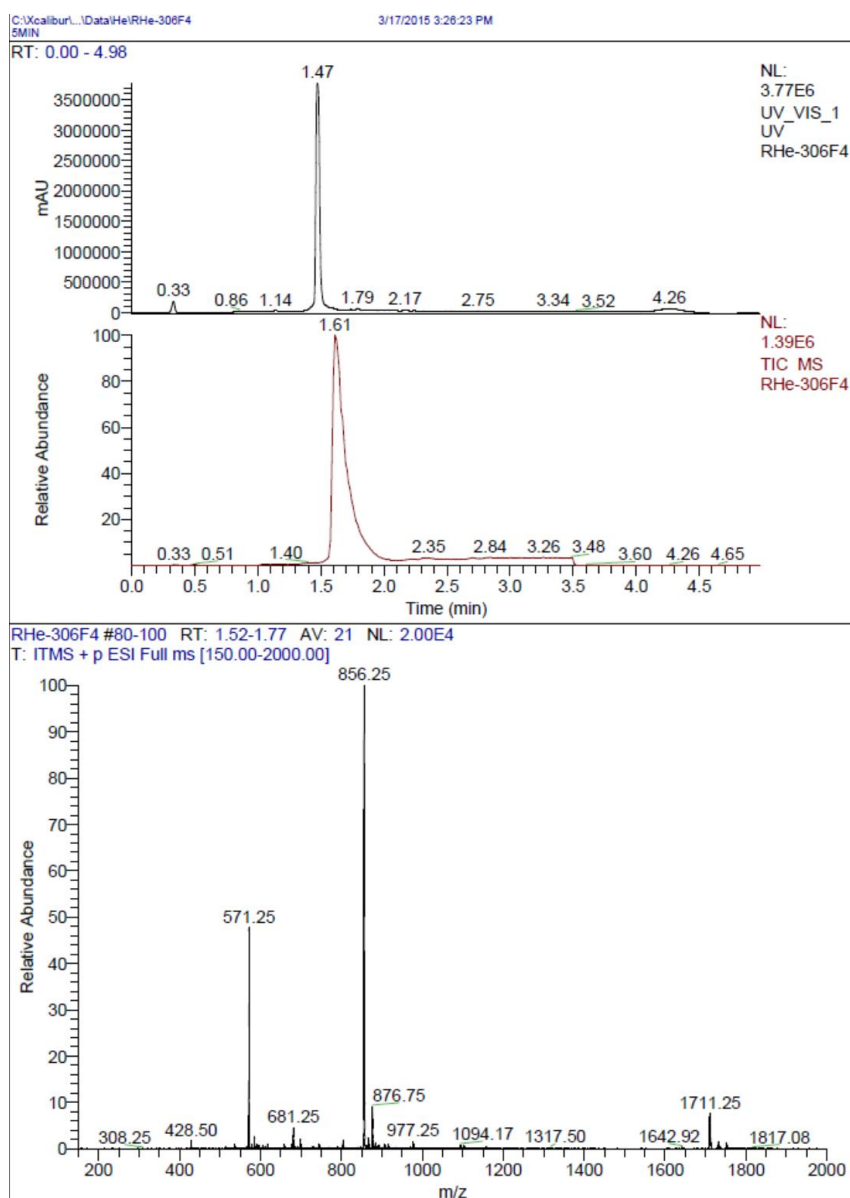

**RH11.** Starting with 400 mg of Tenta Gel S RAM (0.25 mmol/g). Peptide **RH11** was obtained as white solid after preparative RP-HPLC purification (11.2mg, 6.5%). Prep. RP-HPLC (A/D = 100/0 to 0/100 in 60 min, 60 mL/min). Analytical RP-HPLC:  $t_R = 1.61$  min (A/D = 100/0 to 0/100 in 5 min, 1.2 mL/min). MS (ESI+) calculated for  $C_{88}H_{119}N_{21}O_{11}S_2$   $[M+H]^+$ : 1711.15, found: 1711.25.

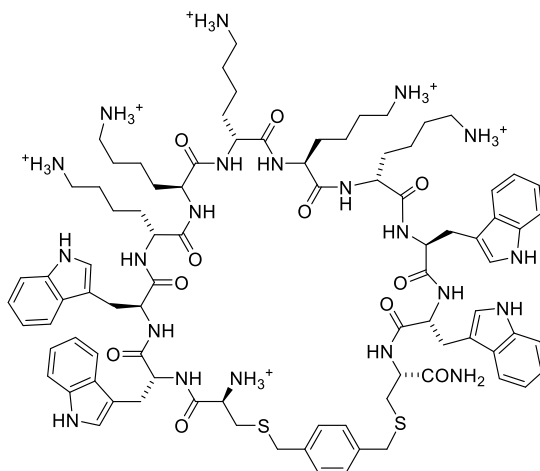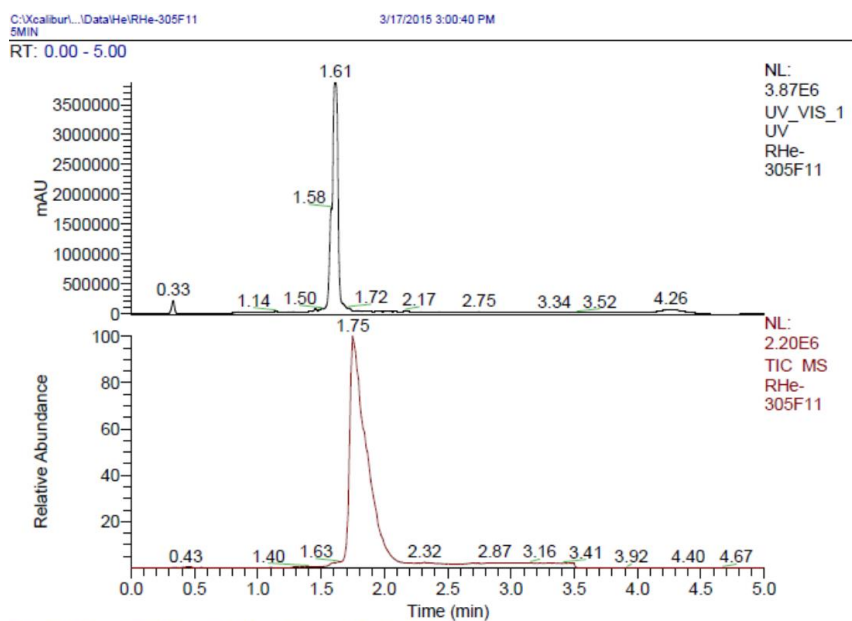

RHe-305F11 #87-109 RT: 1.63-1.90 AV: 23 NL: 2.49E4  
T: ITMS + p ESI Full ms [150.00-2000.00]

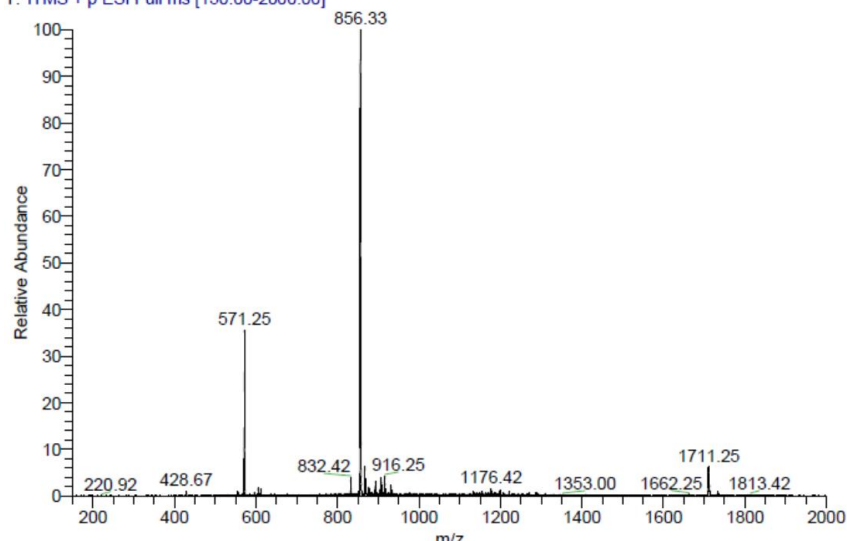

**dRH11.** Starting with 400 mg of Tenta Gel S RAM (0.25 mmol/g). Peptide **dRH11** was obtained as white solid after preparative RP-HPLC purification (8.2 mg, 4.5%). Prep. RP-HPLC (A/D = 100/0 to 0/100 in 60 min, 60 mL/min). Analytical RP-HPLC:  $t_R$  = 1.62 min (A/D = 100/0 to 0/100 in 5 min, 1.2 mL/min). MS (ESI+) calculated for  $C_{88}H_{119}N_{21}O_{11}S_2$   $[M+H]^+$ : 1711.15, found: 1711.17.

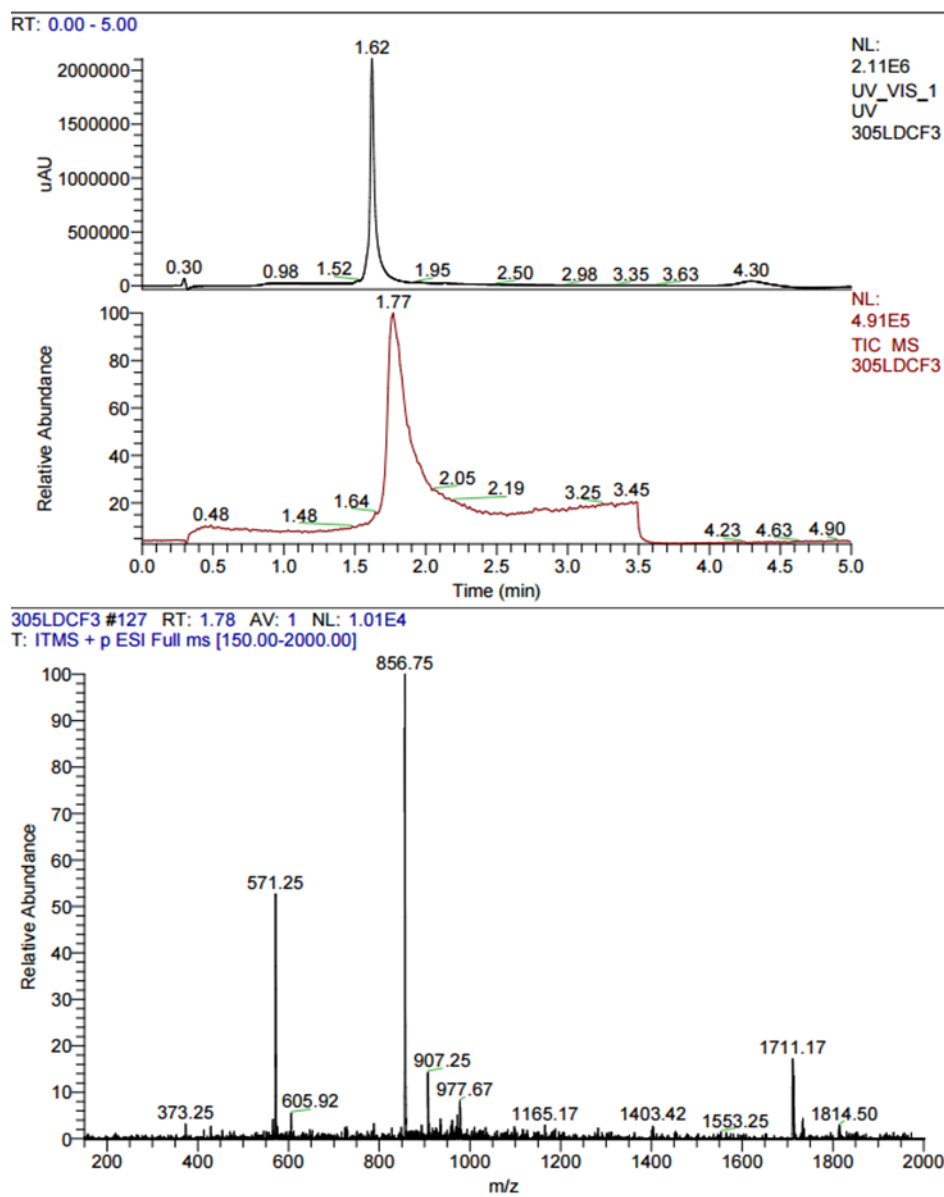



**RH11o.** Starting with 400 mg of Tenta Gel S RAM (0.25 mmol/g). Peptide **RH11o** was obtained as white solid after preparative RP-HPLC purification (8.1mg, 4.7%). Prep. RP-HPLC (A/D = 100/0 to 0/100 in 60 min, 60 mL/min). Analytical RP-HPLC:  $t_R$  = 1.78 min (A/D = 100/0 to 0/100 in 5 min, 1.2 mL/min). MS (ESI+) calculated for  $C_{88}H_{119}N_{21}O_{11}S_2$   $[M+H]^+$ : 1711.15, found: 1711.67.

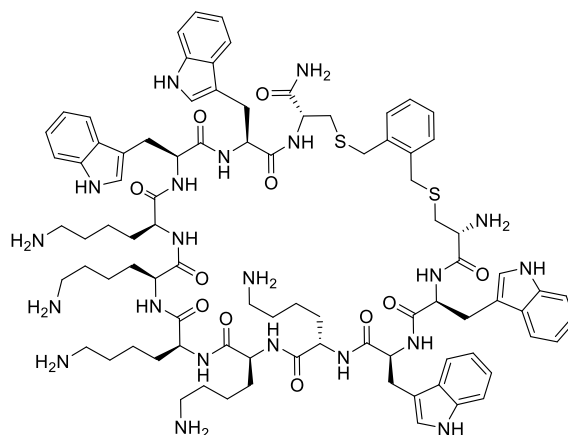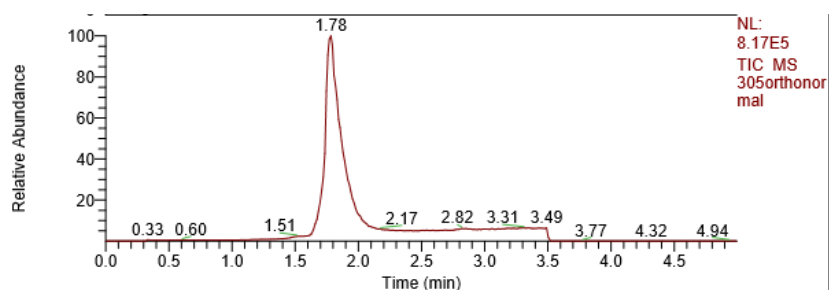

305orthonormal #97 RT: 1.77 AV: 1 NL: 1.74E4  
T: ITMS + p ESI Full ms [150.00-2000.00]

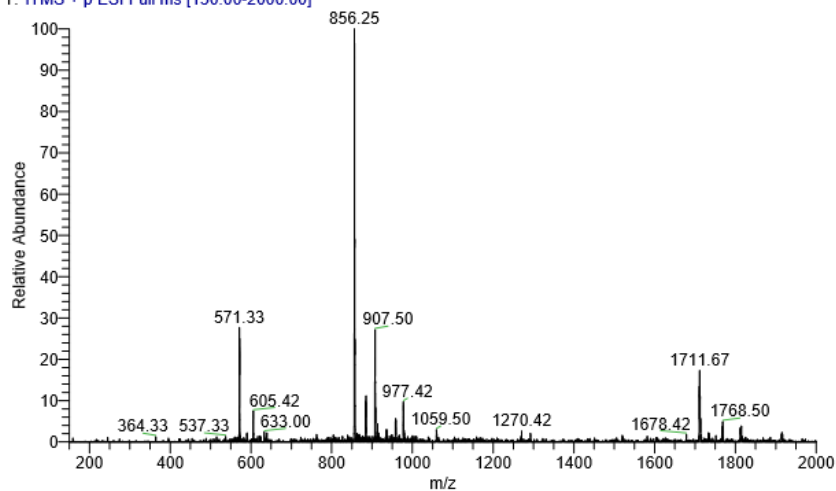

**RH11m.** Starting with 400 mg of Tenta Gel S RAM (0.25 mmol/g). Peptide **RH11m** was obtained as white solid after preparative RP-HPLC purification (9.1mg, 5.2%). Prep. RP-HPLC (A/D = 100/0 to 0/100 in 60 min, 60 mL/min). Analytical RP-HPLC:  $t_R$  = 1.77 min (A/D = 100/0 to 0/100 in 5 min, 1.2 mL/min). MS (ESI+) calculated for  $C_{88}H_{119}N_{21}O_{11}S_2$   $[M+H]^+$ : 1711.15, found: 1711.75.

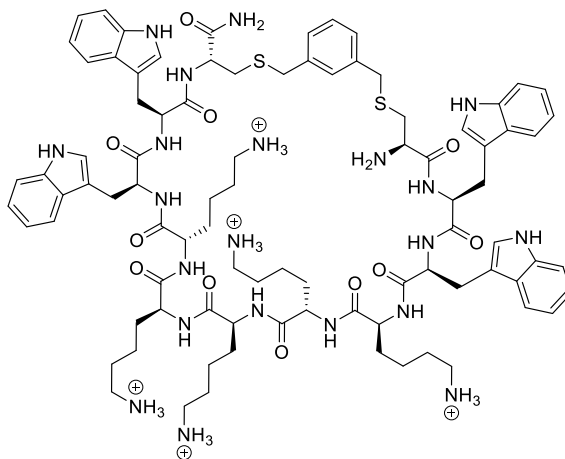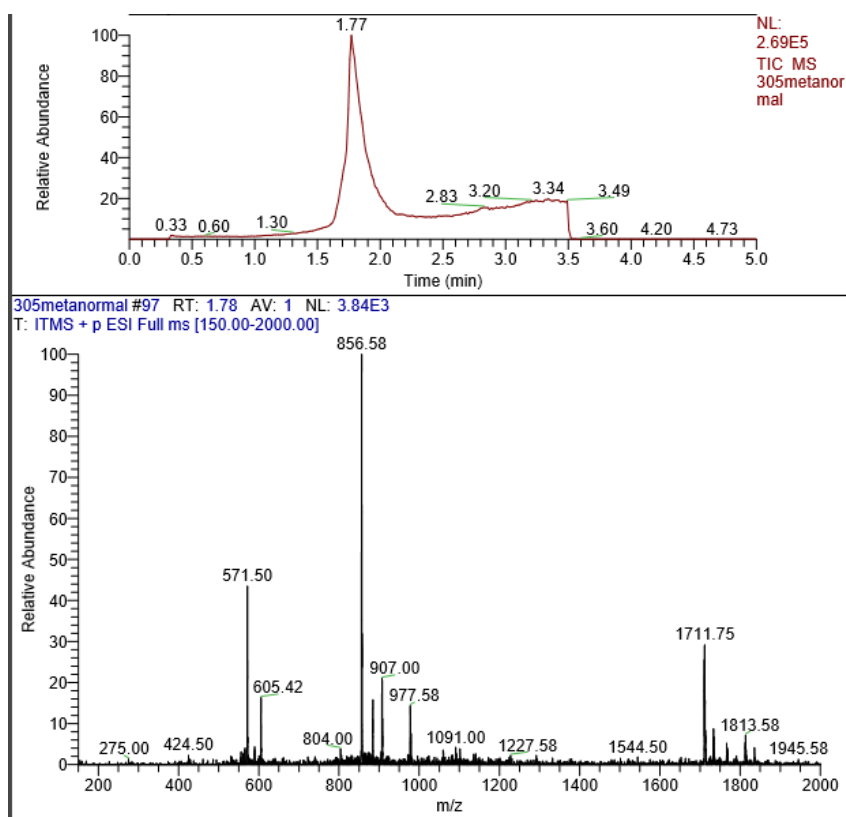

**RH12.** Starting with 400 mg of Tenta Gel S RAM (0.25 mmol/g). Peptide **RH12** was obtained as white solid after preparative RP-HPLC purification (14.1mg, 8.2%). Prep. RP-HPLC (A/D = 100/0 to 0/100 in 60 min, 60 mL/min). Analytical RP-HPLC:  $t_R = 1.33$  min (A/D = 100/0 to 0/100 in 5 min, 1.2 mL/min). MS (ESI+) calculated for  $C_{88}H_{119}N_{21}O_{11}S_2$   $[M+H]^+$ : 1711.15, found: 1711.33.

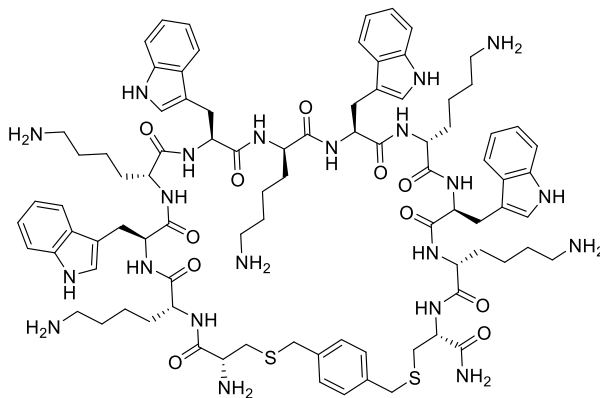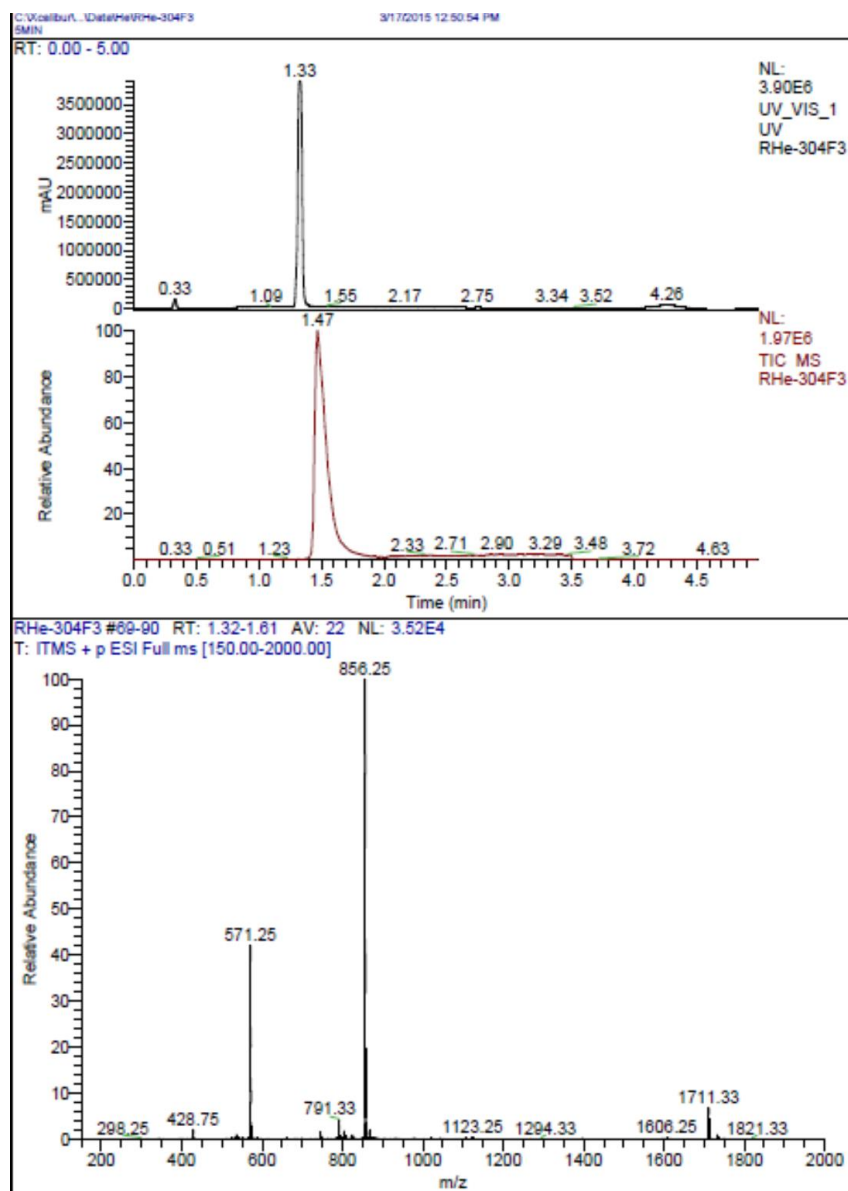

**RH13.** Starting with 400 mg of Tenta Gel S RAM (0.25 mmol/g). Peptide **RH13** was obtained as white solid after preparative RP-HPLC purification (12.2mg, 6.4%). Prep. RP-HPLC (A/D = 100/0 to 0/100 in 60 min, 60 mL/min). Analytical RP-HPLC:  $t_R$  = 1.79 min (A/D = 100/0 to 0/100 in 5 min, 1.2 mL/min). MS (ESI+) calculated for  $C_{99}H_{129}N_{23}O_{12}S_2$   $[M+H]^+$ : 1897.36, found: 1897.33.

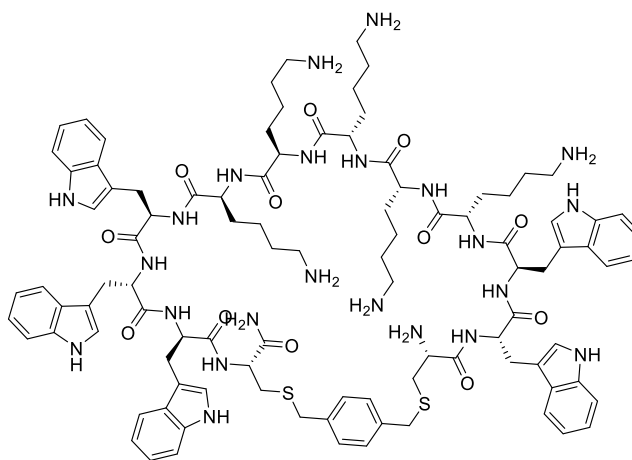

RHe-308F9\_150416012748  
5MIN

16.04.2015 01:27:48

RT: 0.00 - 4.98

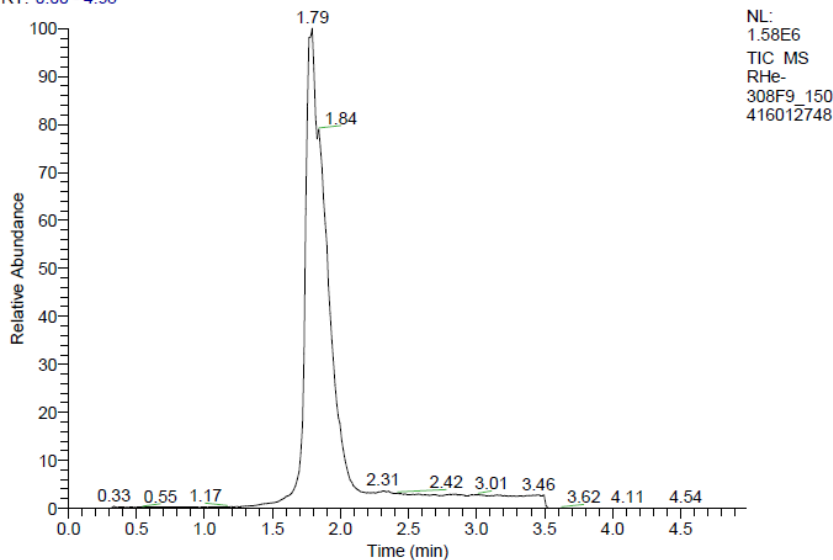

RHe-308F9\_150416012748 #84-126 RT: 1.59-2.11 AV: 43 NL: 7.06E3  
T: ITMS + p ESI Full ms [150.00-2000.00]

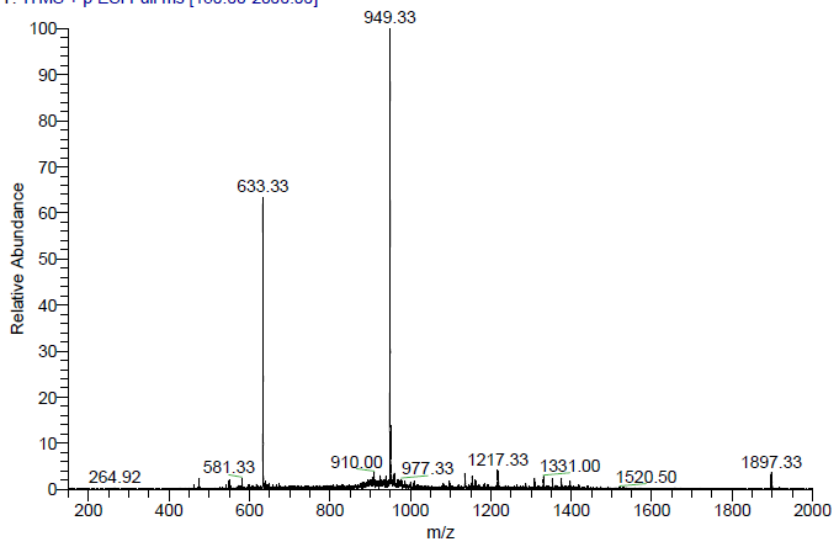

**dRH13.** Starting with 400 mg of Tenta Gel S RAM (0.25 mmol/g). Peptide **dRH13** was obtained as white solid after preparative RP-HPLC purification (6.1 mg, 3.4%). Prep. RP-HPLC (A/D = 100/0 to 0/100 in 60 min, 60 mL/min). Analytical RP-HPLC:  $t_R = 1.67$  min (A/D = 100/0 to 0/100 in 5 min, 1.2 mL/min). MS (ESI+) calculated for  $C_{99}H_{129}N_{23}O_{12}S_2$   $[M+H]^+$ : 1897.36, found: 1898.25.

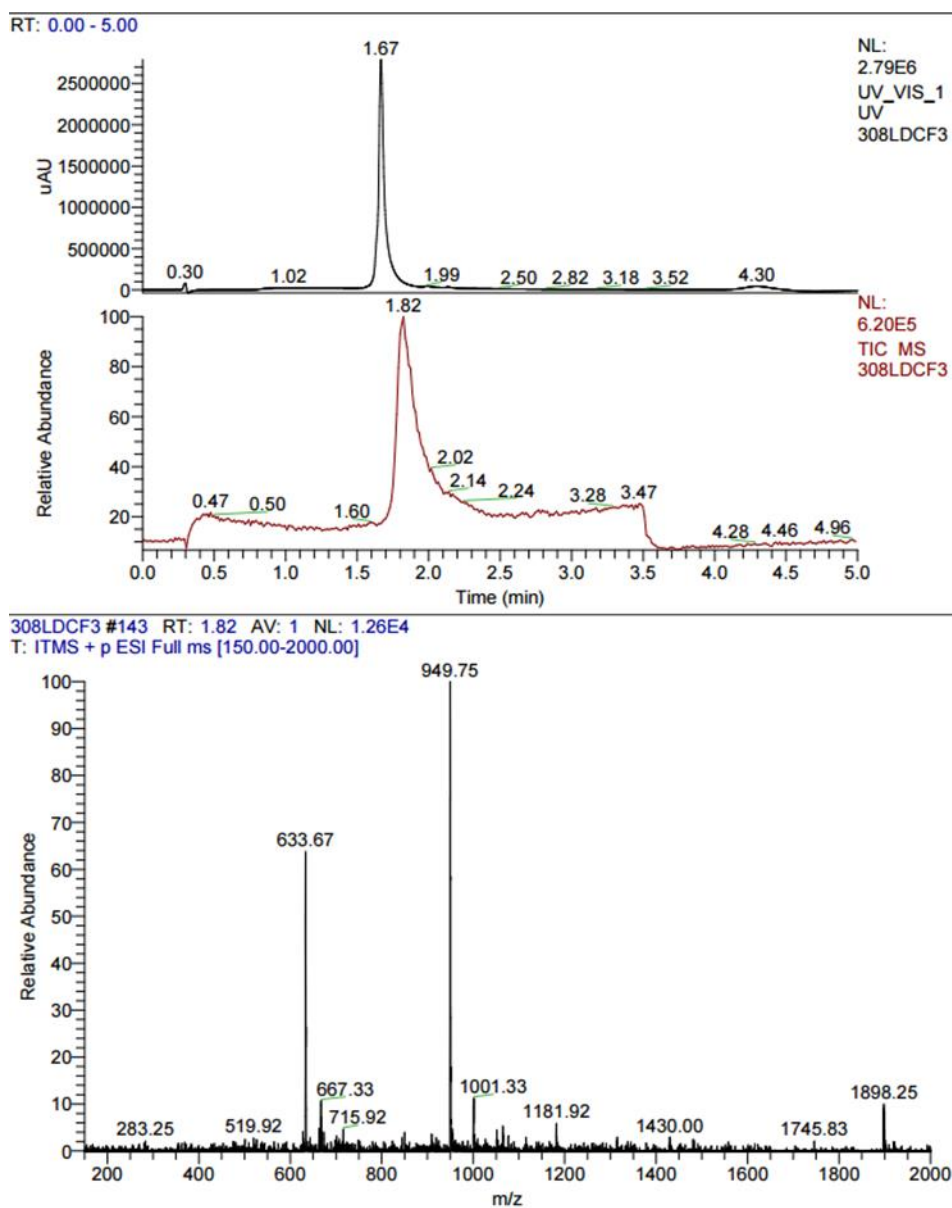

**RH14.** Starting with 400 mg of Tenta Gel S RAM (0.25 mmol/g). Peptide **RH14** was obtained as white solid after preparative RP-HPLC purification (10.5mg, 5.9%). Prep. RP-HPLC (A/D = 100/0 to 0/100 in 60 min, 60 mL/min). Analytical RP-HPLC:  $t_R = 1.71$  min (A/D = 100/0 to 0/100 in 5 min, 1.2 mL/min). MS (ESI+) calculated for  $C_{93}H_{117}N_{21}O_{11}S_2$   $[M+H]^+$ : 1768.87, found: 1768.25.

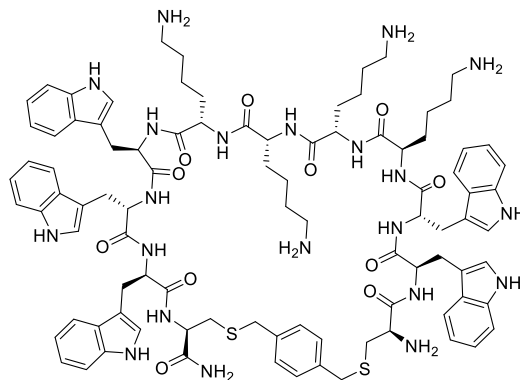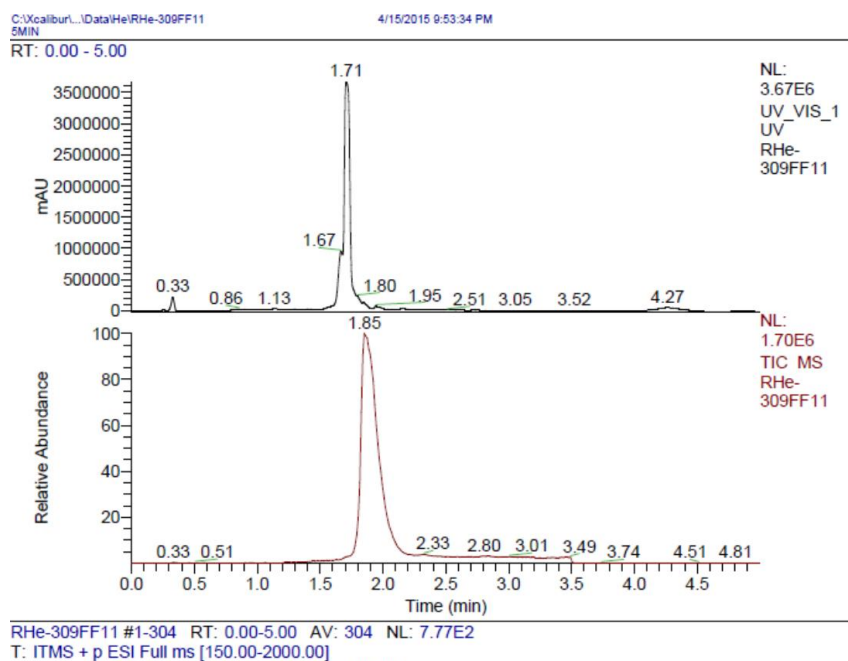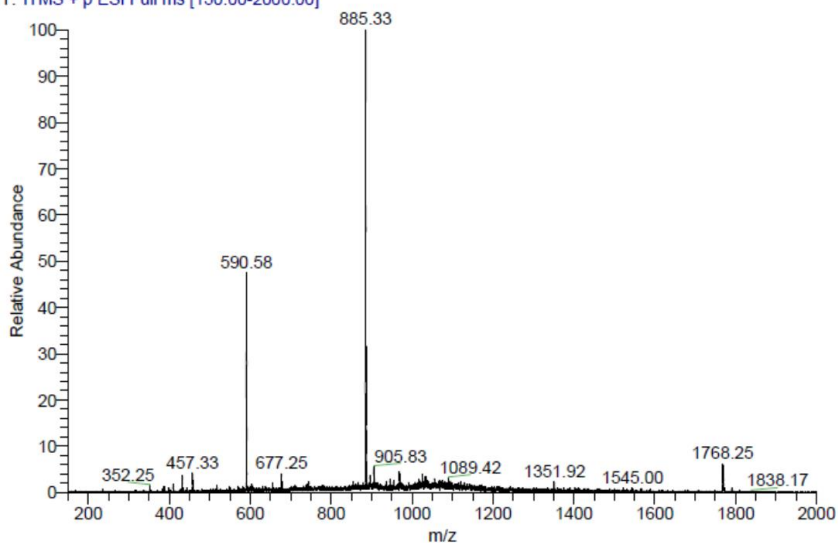

**RH15.** Starting with 400 mg of Tenta Gel S RAM (0.25 mmol/g). Peptide **RH15** was obtained as white solid after preparative RP-HPLC purification (14.8mg, 9.0%). Prep. RP-HPLC (A/D = 100/0 to 0/100 in 60 min, 60 mL/min). Analytical RP-HPLC:  $t_R$  = 1.51 min (A/D = 100/0 to 0/100 in 5 min, 1.2 mL/min). MS (ESI+) calculated for  $C_{83}H_{121}N_{21}O_{11}S_2$   $[M+H]^+$ : 1652.90, found: 1652.42.

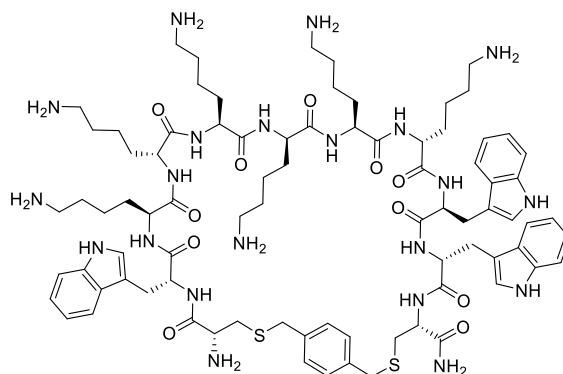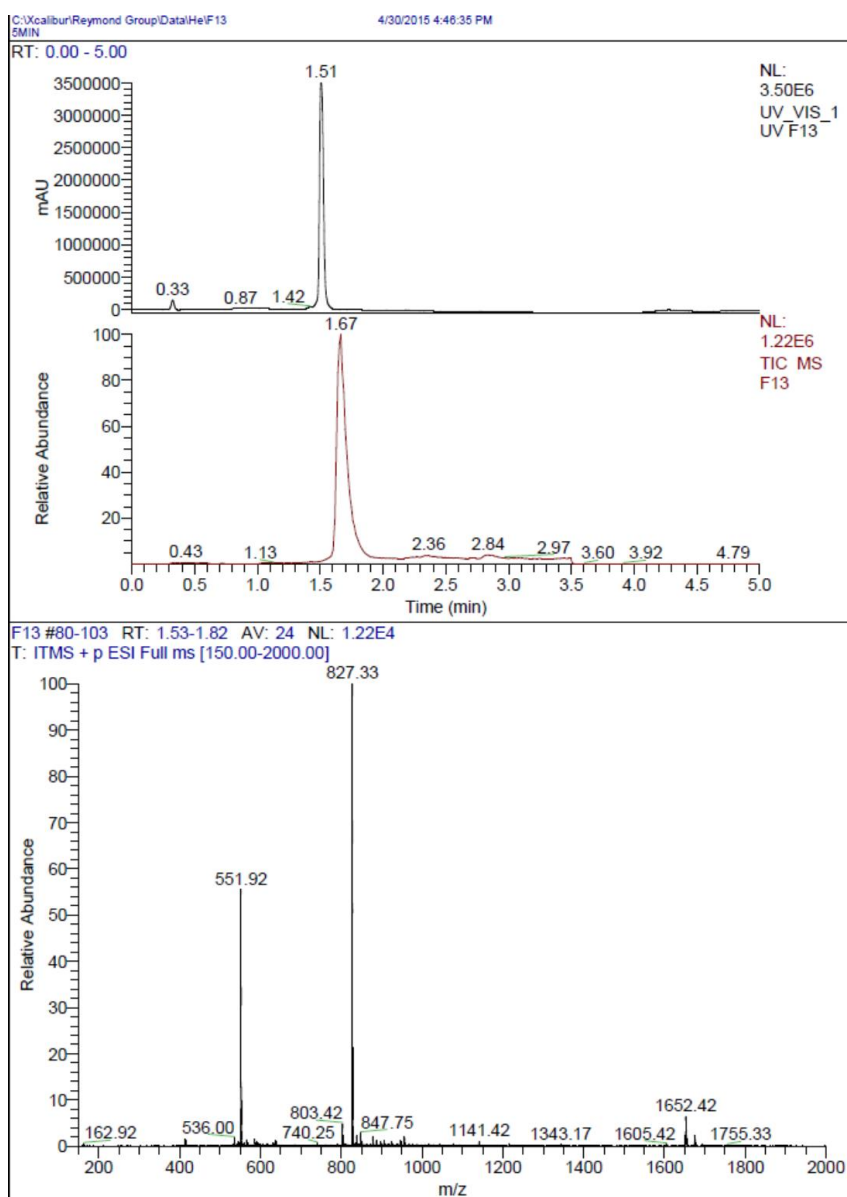

**RH16.** Starting with 400 mg of Tenta Gel S RAM (0.25 mmol/g). Peptide **RH16** was obtained as white solid after preparative RP-HPLC purification (35.7mg, 25.2%). Prep. RP-HPLC (A/D = 100/0 to 0/100 in 60 min, 60 mL/min). Analytical RP-HPLC:  $t_R = 1.76$  min (A/D = 100/0 to 0/100 in 5 min, 1.2 mL/min). MS (ESI+) calculated for  $C_{68}H_{123}N_{17}O_{11}S_2$   $[M+H]^+$ : 1418.9, found: 1418.58.

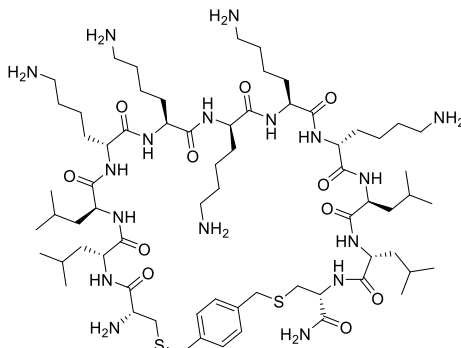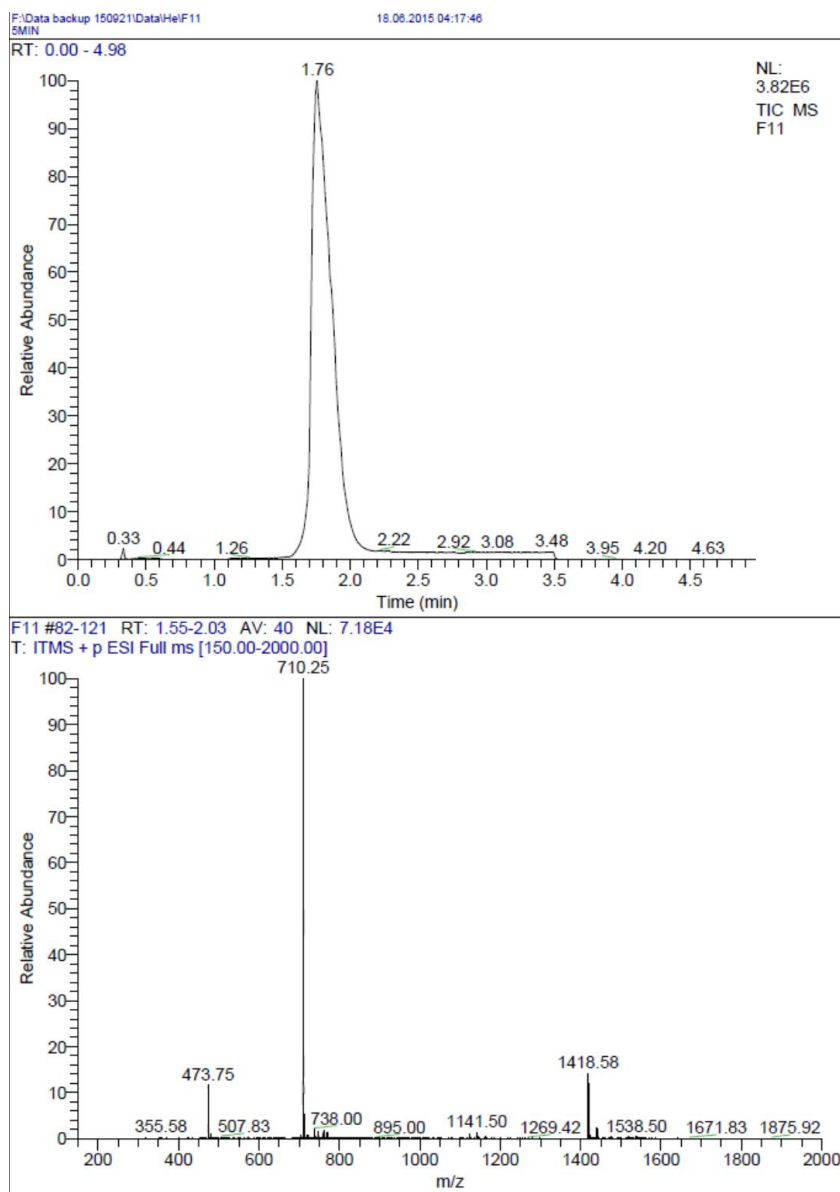



**RH17.** Starting with 400 mg of Tenta Gel S RAM (0.25 mmol/g). Peptide **RH17** was obtained as white solid after preparative RP-HPLC purification (19.6mg, 11.5%). Prep. RP-HPLC (A/D = 100/0 to 0/100 in 60 min, 60 mL/min). Analytical RP-HPLC:  $t_R = 1.61$  min (A/D = 100/0 to 0/100 in 5 min, 1.2 mL/min). MS (ESI+) calculated for  $C_{88}H_{119}N_{21}O_{11}S_2$   $[M+H]^+$ : 1711.15, found: 1711.67.

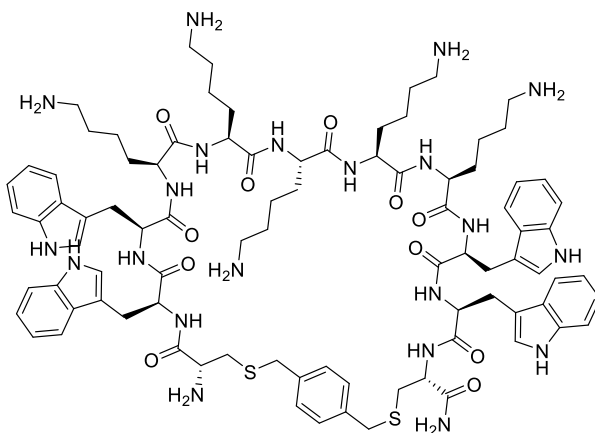

C:\Xcalibur\reymond group\Data\He\RH319F9

1/5/2016 4:43:29 PM

RT: 0.00 - 5.00

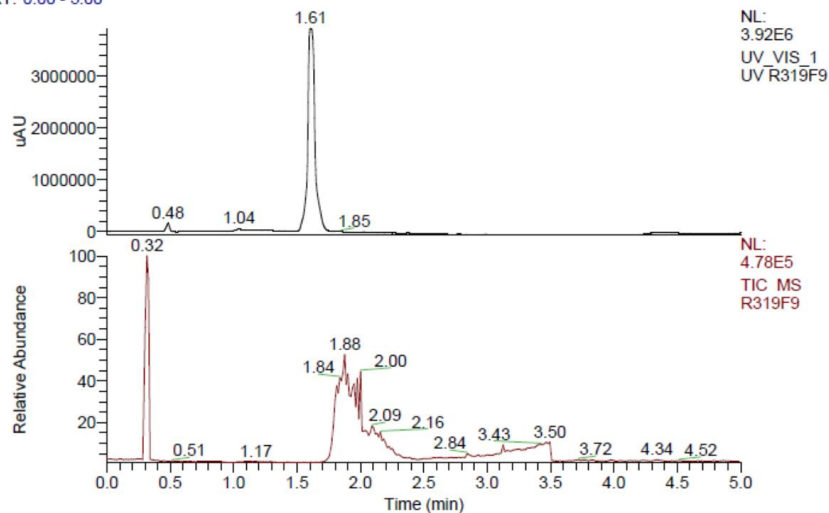R319F9 #90-136 RT: 1.70-2.34 AV: 47 NL: 3.81E3  
T: ITMS + p ESI Full ms [150.00-2000.00]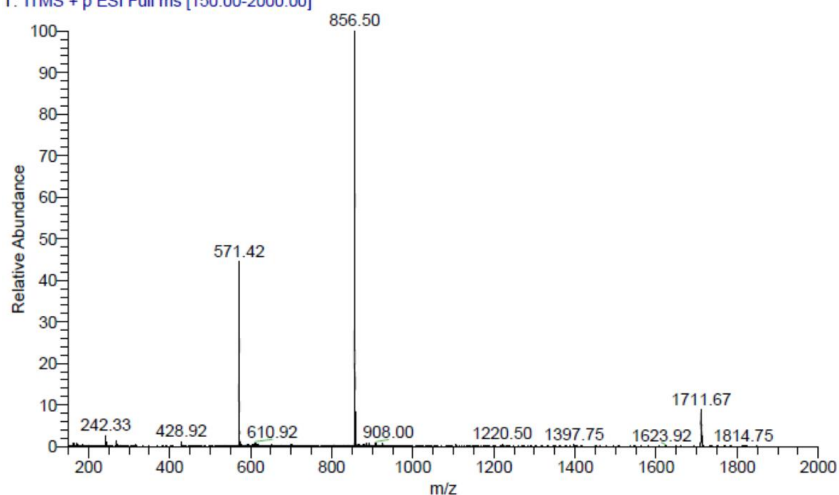

**RH18.** Starting with 400 mg of Tenta Gel S RAM (0.25 mmol/g). Peptide **RH18** was obtained as white solid after preparative RP-HPLC purification (6.5mg, 3.7%). Prep. RP-HPLC (A/D = 100/0 to 0/100 in 60 min, 60 mL/min). Analytical RP-HPLC:  $t_R$  = 1.78 min (A/D = 100/0 to 0/100 in 5 min, 1.2 mL/min). MS (ESI+) calculated for  $C_{90}H_{123}N_{21}O_{11}S_2$   $[M+H]^+$ : 1739.20, found: 1739.25.

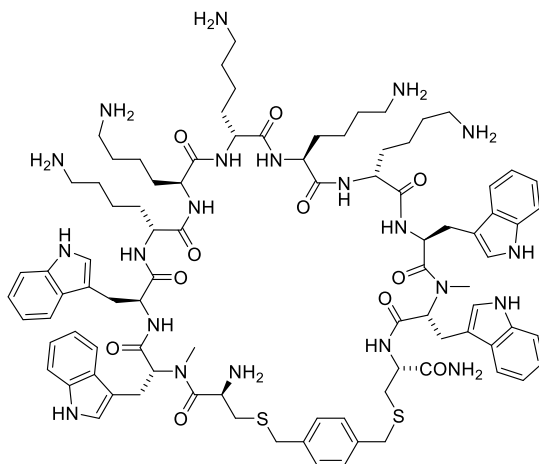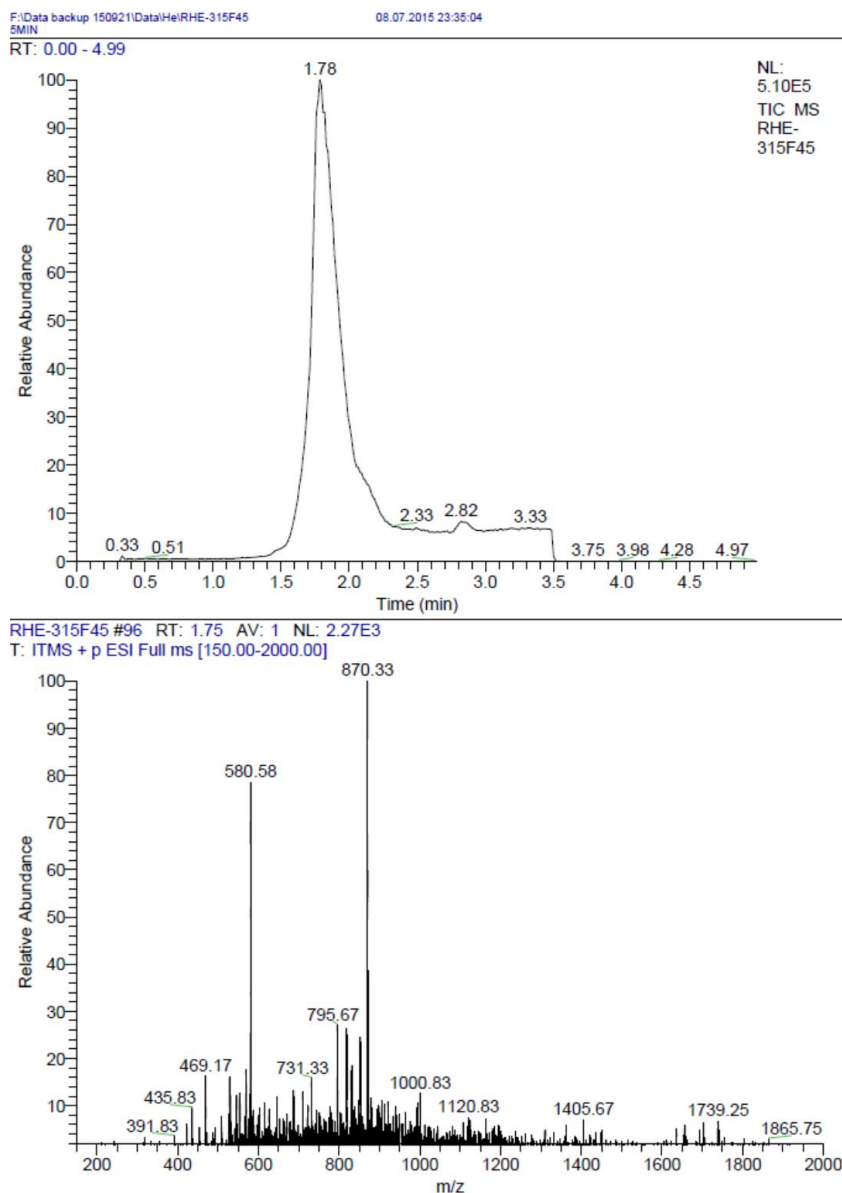

**RH19.** Starting with 400 mg of Tenta Gel S RAM (0.25 mmol/g). Peptide **RH19** was obtained as white solid after preparative RP-HPLC purification (3.6mg, 2.1%). Prep. RP-HPLC (A/D = 100/0 to 0/100 in 60 min, 60 mL/min). Analytical RP-HPLC:  $t_R$  = 1.91 min (A/D = 100/0 to 0/100 in 5 min, 1.2 mL/min). MS (ESI+) calculated for  $C_{90}H_{123}N_{21}O_{11}S_2$   $[M+H]^+$ : 1738.9, found: 1739.58

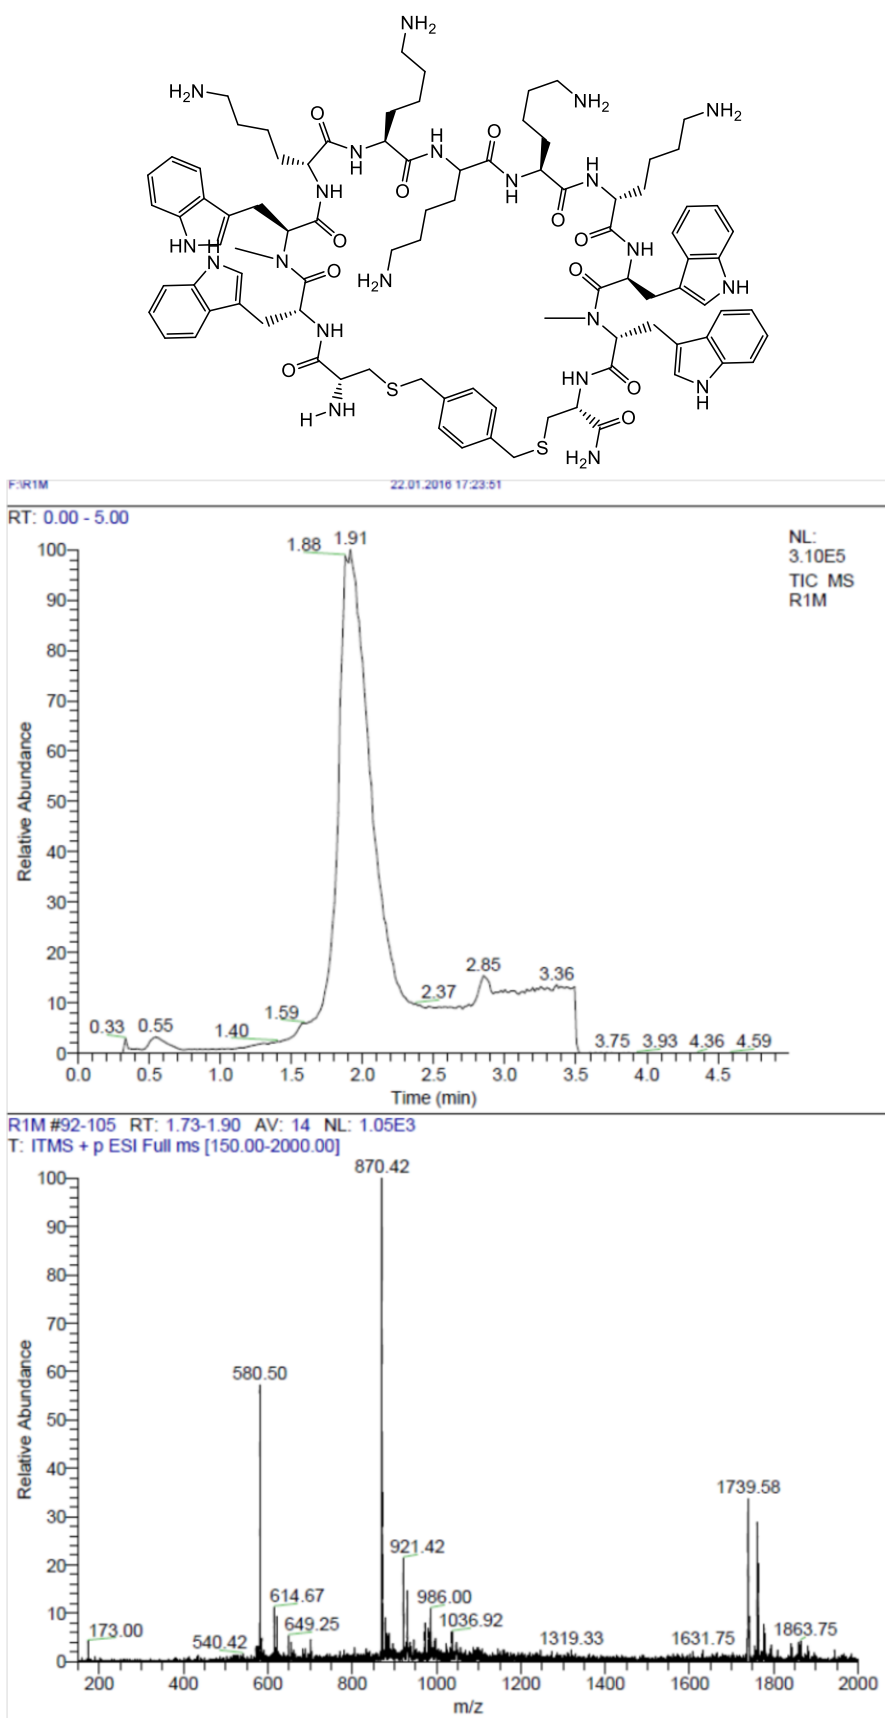

**RH20.** Starting with 400 mg of Tenta Gel S RAM (0.25 mmol/g). Peptide **RH20** was obtained as white solid after preparative RP-HPLC purification (3.8mg, 2.2%). Prep. RP-HPLC (A/D = 100/0 to 0/100 in 60 min, 60 mL/min). Analytical RP-HPLC:  $t_R = 1.61$  min (A/D = 100/0 to 0/100 in 5 min, 1.2 mL/min). MS (ESI+) calculated for  $C_{90}H_{123}N_{21}O_{11}S_2$   $[M+H]^+$ : 1738.9, found: 1739.58

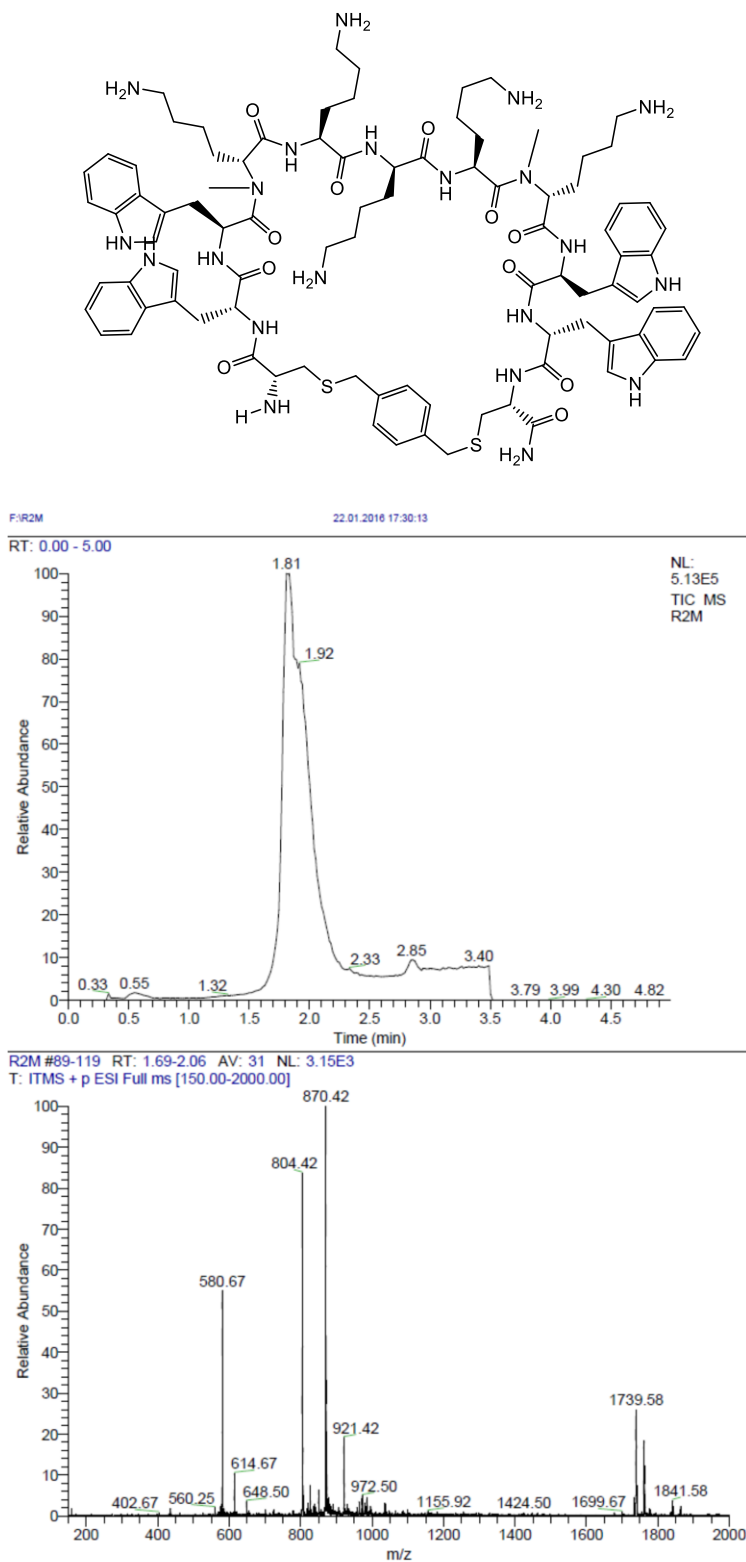

**FRH11o.** Starting with 400 mg of Tenta Gel S RAM (0.25 mmol/g). Peptide **FRH11o** was obtained as white solid after preparative RP-HPLC purification (8.3mg, 4.8%). Prep. RP-HPLC (A/D = 100/0 to 0/100 in 60 min, 60 mL/min). Analytical RP-HPLC:  $t_R$  = 3.88 min (A/D = 100/0 to 0/100 in 10 min, 1.2 mL/min). MS (ESI+) calculated for  $C_{96}H_{131}N_{21}O_{16}S_2$   $[M+H]^+$ : 1899.32, found: 1899.68.

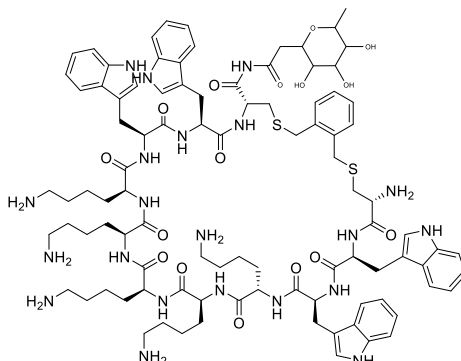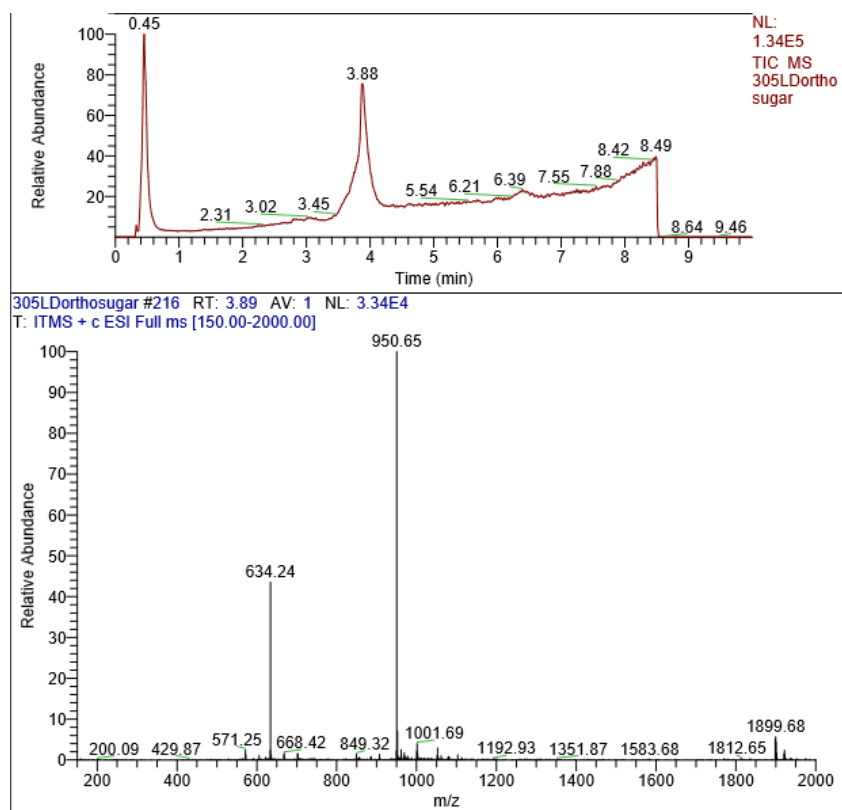

**FdRH11o.** Starting with 400 mg of Tenta Gel S RAM (0.25 mmol/g). Peptide **FdRH11o** was obtained as white solid after preparative RP-HPLC purification (8.1mg, 4.7%). Prep. RP-HPLC (A/D = 100/0 to 0/100 in 60 min, 60 mL/min). Analytical RP-HPLC:  $t_R$  = 3.88 min (A/D = 100/0 to 0/100 in 10 min, 1.2 mL/min). MS (ESI+) calculated for  $C_{96}H_{131}N_{21}O_{16}S_2$   $[M+H]^+$ : 1899.32, found: 1899.68.

**FdRH11m.** Starting with 400 mg of Tenta Gel S RAM (0.25 mmol/g). Peptide **FdRH11m** was obtained as white solid after preparative RP-HPLC purification (5.9mg, 3.4%). Prep. RP-HPLC (A/D = 100/0 to 0/100 in 60 min, 60 mL/min). Analytical RP-HPLC:  $t_R = 3.73$  min (A/D = 100/0 to 0/100 in 10 min, 1.2 mL/min). MS (ESI+) calculated for  $C_{96}H_{131}N_{21}O_{16}S_2$   $[M+H]^+$ : 1899.32, found: 1899.63.

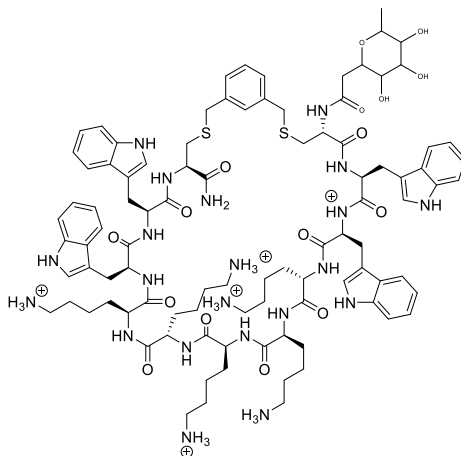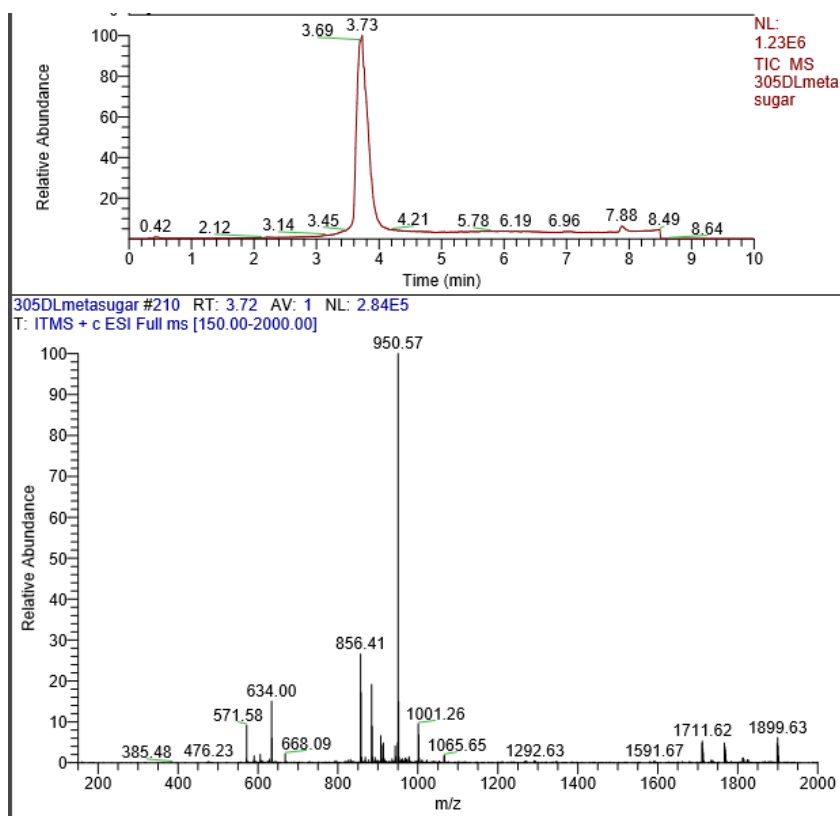

**FRH11m.** Starting with 400 mg of Tenta Gel S RAM (0.25 mmol/g). Peptide **FRH11m** was obtained as white solid after preparative RP-HPLC purification (6.2mg, 3.6%). Prep. RP-HPLC (A/D = 100/0 to 0/100 in 60 min, 60 mL/min). Analytical RP-HPLC:  $t_R = 3.73$  min (A/D = 100/0 to 0/100 in 10 min, 1.2 mL/min). MS (ESI+) calculated for  $C_{96}H_{131}N_{21}O_{16}S_2$   $[M+H]^+$ : 1899.32, found: 1899.63.

**FdRH11p.** Starting with 400 mg of Tenta Gel S RAM (0.25 mmol/g). Peptide **FdRH11p** was obtained as white solid after preparative RP-HPLC purification (7.0mg, 4.0%). Prep. RP-HPLC (A/D = 100/0 to 0/100 in 60 min, 60 mL/min). Analytical RP-HPLC:  $t_R$  = 3.64 min (A/D = 100/0 to 0/100 in 10 min, 1.2 mL/min). MS (ESI+) calculated for  $C_{96}H_{131}N_{21}O_{16}S_2$   $[M+H]^+$ : 1899.32, found: 1899.63.

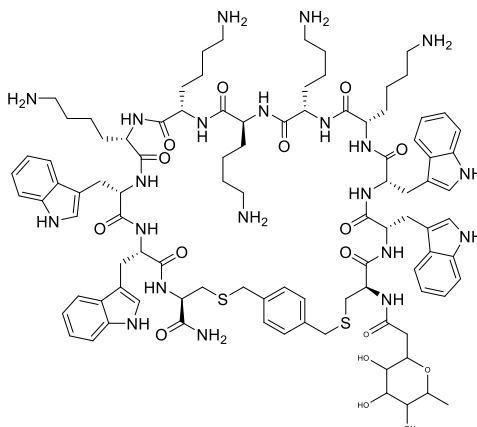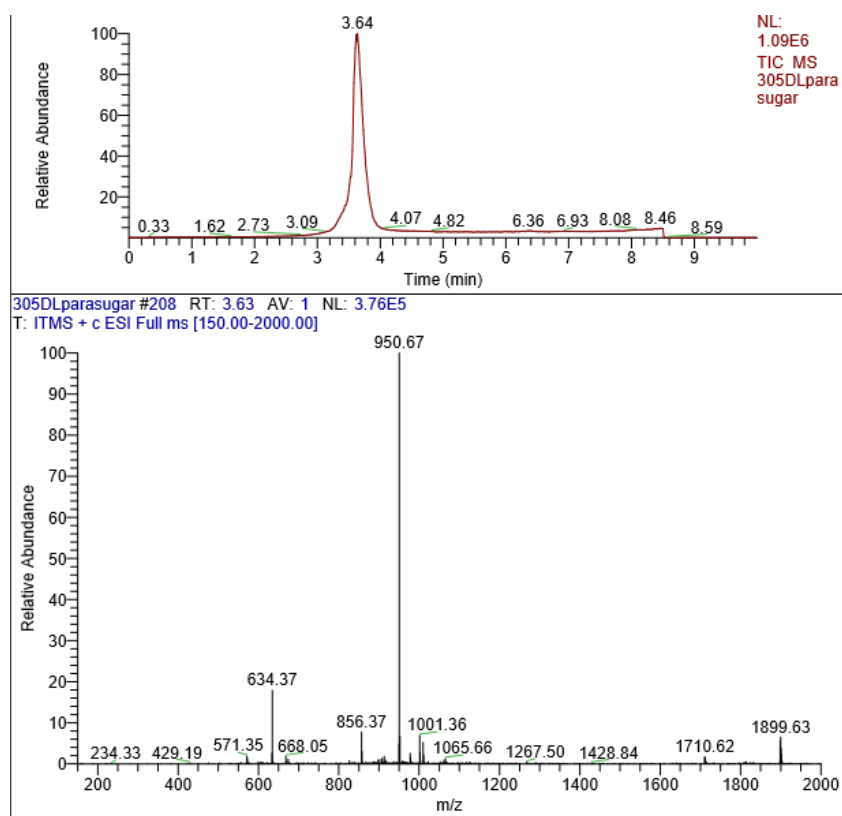

**FRH11p.** Starting with 400 mg of Tenta Gel S RAM (0.25 mmol/g). Peptide **FRH11p** was obtained as white solid after preparative RP-HPLC purification (6.3mg, 3.6%). Prep. RP-HPLC (A/D = 100/0 to 0/100 in 60 min, 60 mL/min). Analytical RP-HPLC:  $t_R$  = 3.64 min (A/D = 100/0 to 0/100 in 10 min, 1.2 mL/min). MS (ESI+) calculated for  $C_{96}H_{131}N_{21}O_{16}S_2$   $[M+H]^+$ : 1899.32, found: 1899.63.

**FddRH11p.** Starting with 400 mg of Tenta Gel S RAM (0.25 mmol/g). Peptide **FddRH11p** was obtained as white solid after preparative RP-HPLC purification (8.8mg, 5.1%). Prep. RP-HPLC (A/D = 100/0 to 0/100 in 60 min, 60 mL/min). Analytical RP-HPLC:  $t_R$  = 3.30 min (A/D = 100/0 to 0/100 in 10 min, 1.2 mL/min). MS (ESI+) calculated for  $C_{96}H_{131}N_{21}O_{16}S_2$   $[M+H]^+$ : 1899.32, found: 1899.73.

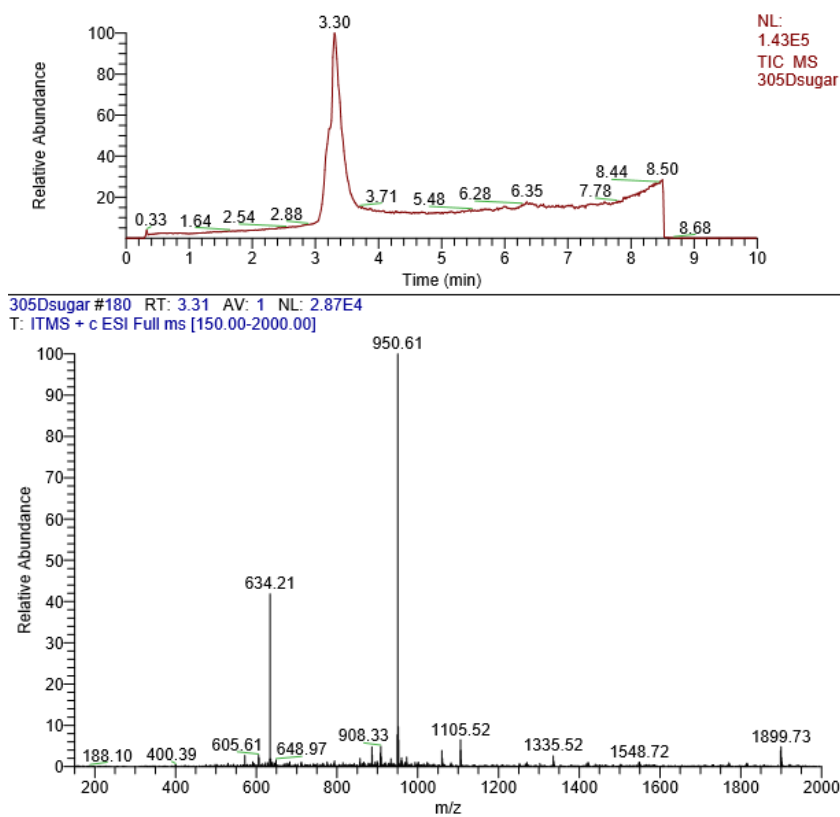

**FRH13o.** Starting with 400 mg of Tenta Gel S RAM (0.25 mmol/g). Peptide **FRH13o** was obtained as white solid after preparative RP-HPLC purification (3.2mg, 1.6%). Prep. RP-HPLC (A/D = 100/0 to 0/100 in 60 min, 60 mL/min). Analytical RP-HPLC:  $t_R$  = 3.79 min (A/D = 100/0 to 0/100 in 10 min, 1.2 mL/min). MS (ESI+) calculated for  $C_{107}H_{141}N_{23}O_{17}S_2$   $[M+H]^+$ : 2085.53, found: 2085.33.



**FRH13m.** Starting with 400 mg of Tenta Gel S RAM (0.25 mmol/g). Peptide **FRH13m** was obtained as white solid after preparative RP-HPLC (3.5mg, 1.8%). Prep. RP-HPLC (A/D = 100/0 to 0/100 in 60 min, 60 mL/min). Analytical RP-HPLC:  $t_R = 3.79$  min (A/D = 100/0 to 0/100 in 10 min, 1.2 mL/min). MS (ESI+) calculated for  $C_{107}H_{141}N_{23}O_{17}S_2$   $[M+H]^+$ : 2085.53, found: 2085.33.

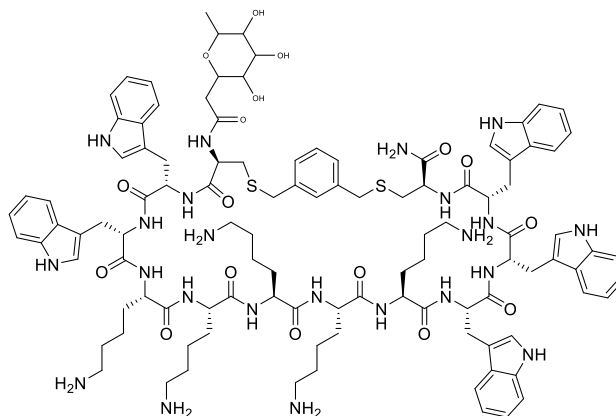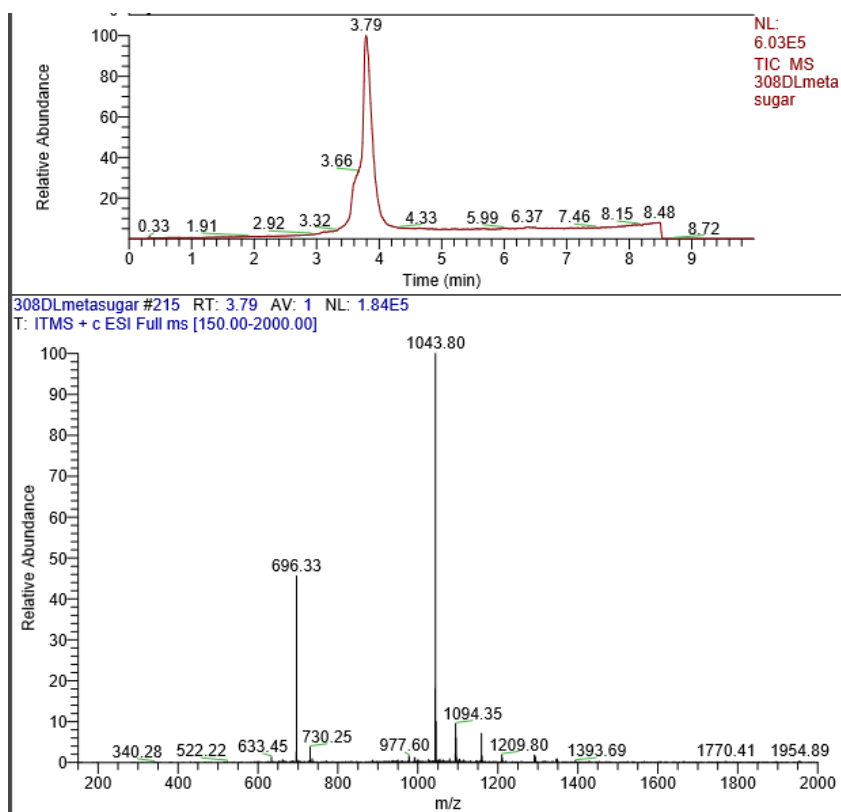

**FRH13p.** Starting with 400 mg of Tenta Gel S RAM (0.25 mmol/g). Peptide **FRH13p** was obtained as white solid after preparative RP-HPLC purification (3.3mg, 1.6%). Prep. RP-HPLC (A/D = 100/0 to 0/100 in 60 min, 60 mL/min). Analytical RP-HPLC:  $t_R$  = 3.82 min (A/D = 100/0 to 0/100 in 10 min, 1.2 mL/min). MS (ESI+) calculated for  $C_{107}H_{141}N_{23}O_{17}S_2$   $[M+H]^+$ : 2085.53, found: 2085.33.

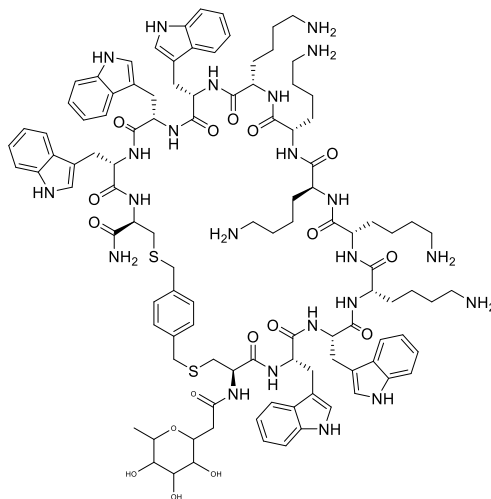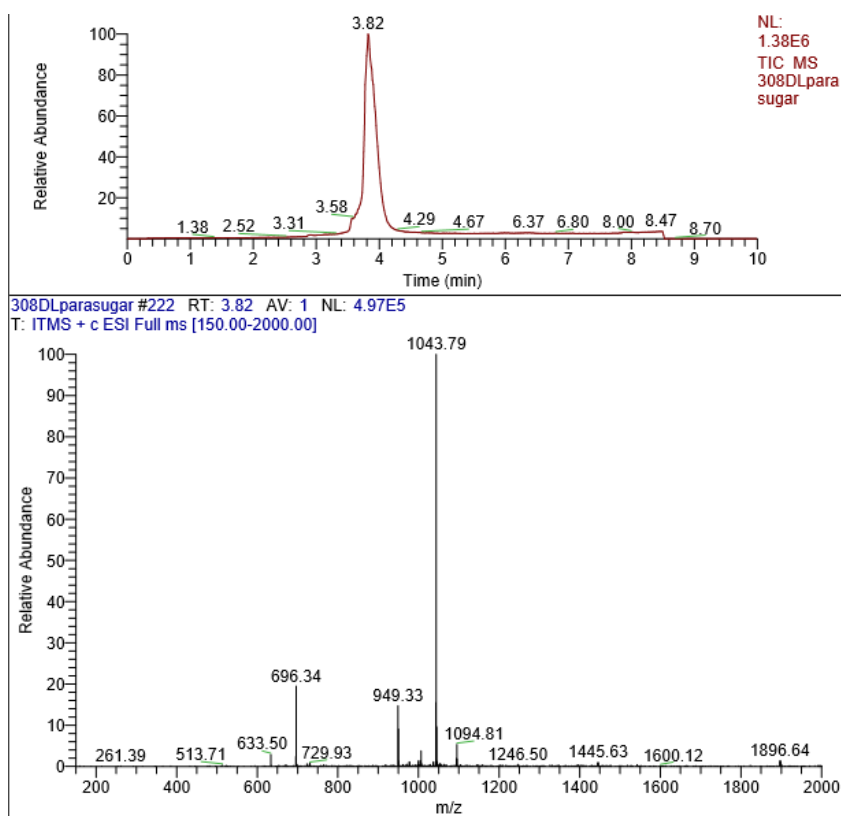

Supplement: c7sc01599b1.pdf [file c7sc01599b1.pdf]
